# Supplementary material
Source: PubMed Central journal article supplement (PMC9606515)
Supplement: bjophthalmol-2020-318719supp001.pdf [file bjophthalmol-2020-318719supp001.pdf]

## Supplementary appendix to:

### **Development and validation of a new clinical decision support tool to optimize screening for retinopathy of prematurity**

Aldina Pivodic M.Sc., Helena Johansson Ph.D., Lois E.H. Smith M.D., Ph.D., Anna-Lena Hård M.D., Ph.D., Chatarina Löfqvist, PhD., Bradley Yoder, M.D., M. Elizabeth Hartnett M.D., Carolyn Wu M.D., PhD., Marie-Christine Bründer M.D., Wolf A. Lagrèze M.D., Andreas Stahl M.D., Abbas Al-Hawasi M.D., Eva Larsson M.D., Ph.D., Pia Lundgren M.D., Ph.D., Lotta Gränse, M.D., Ph.D., Birgitta Sunnqvist, M.D., Kristina Tornqvist, M.D., Ph.D., Agneta Wallin, M.D., Gerd Holmström M.D., Ph.D., Kerstin Albertsson-Wikland M.D., Ph.D., Staffan Nilsson Ph.D., Ann Hellström M.D., Ph.D.

## Contents

|                                                                                                                                                                                                                                                                                                                                                   |    |
|---------------------------------------------------------------------------------------------------------------------------------------------------------------------------------------------------------------------------------------------------------------------------------------------------------------------------------------------------|----|
| eAppendix 1. Statistical methods.....                                                                                                                                                                                                                                                                                                             | 3  |
| eAppendix 2. Supplementary figures and tables.....                                                                                                                                                                                                                                                                                                | 4  |
| eFigure 1. Work-flow for DIGIROP-Screen and four comparison models.....                                                                                                                                                                                                                                                                           | 5  |
| eFigure 2. Estimated probabilities at birth (A) and over postnatal ages (PNA) 6-14 weeks (B-J) using DIGIROP-Screen for model development group (N=6991).....                                                                                                                                                                                     | 6  |
| eFigure 3. Area under the receiver operating characteristic curve (AUC) for prediction models at birth and postnatal ages (PNA) at 6, 8, 10, 12 weeks for model development group (N=6991).....                                                                                                                                                   | 11 |
| eFigure 4. Specificity (A) and cumulative specificity (B) with 95% CI obtained using cut-offs based on estimated probabilities for 100% sensitivity over postnatal ages 6-14 weeks for model development group (N=6991).....                                                                                                                      | 12 |
| eFigure 5. Estimated probabilities at birth (A) and over postnatal ages (PNA) 6-14 weeks (B-J) using DIGIROP-Screen for external validation groups (N=1241).....                                                                                                                                                                                  | 13 |
| eFigure 6. Specificity (A) and cumulative specificity (B) with 95% CI obtained using cut-offs based on estimated probabilities for 100% sensitivity over postnatal ages 6-14 weeks for external validation groups (N=1241).....                                                                                                                   | 18 |
| eFigure 7. Infants released from screening for retinopathy of prematurity (ROP) over postnatal ages for infants born 24-30 Weeks of gestational age according to actual ROP screening performed, and risk predictions from DIGIROP-Screen in model development group (DevGroup) and validation groups (ValGroups).....                            | 19 |
| eFigure 8. Follow-up of infants using DIGIROP-Screen.....                                                                                                                                                                                                                                                                                         | 20 |
| eTable 1. Infants' characteristics at birth, first sign of retinopathy of prematurity and retinopathy of prematurity treatment for model development group and four external validation cohorts.....                                                                                                                                              | 23 |
| eTable 2. Infants' characteristics at birth, first sign of retinopathy of prematurity and retinopathy of prematurity treatment for model development group and external validation groups for infants with and without retinopathy of prematurity treatment.....                                                                                  | 25 |
| eTable 3. Final prediction models in model development group for postnatal ages 6-14 weeks (N=6991).....                                                                                                                                                                                                                                          | 27 |
| eTable 4. Gestational age-specific cut-offs (estimated probabilities for retinopathy of prematurity treatment) based on DIGIROP-Screen in model development group (N=6991).....                                                                                                                                                                   | 29 |
| eTable 5. Area under the receiver operating characteristic curve (AUC) with 95% CI at birth and over postnatal ages 6-14 weeks for model development group (N=6991), internal validation using 10-fold cross-validation (N=6991) and external validation groups (N=1241).....                                                                     | 30 |
| eTable 6. Specificity and cumulative specificity with 95% CI for 100% sensitivity over postnatal weeks for model development group (N=6991), internal validation using 10-fold cross-validation (N=6991) and external validation groups (N=1241) overall and by gestational age of <28 and ≥28 weeks, and for white and non-white population..... | 31 |
| eTable 7. Distribution of maximum retinopathy of prematurity stage for infants not needing and needing retinopathy of prematurity screening according to DIGIROP-Screen (N=6991).....                                                                                                                                                             | 33 |

## eAppendix 1. Statistical methods

### Modelling in model development group (DevGroup)

At birth only individual probabilities from DIGIROP-Birth were used. Multivariable logistic regression was applied over postnatal ages (PNAs) 6 to 14 weeks. In the subsequent models over PNA the log-odds for DIGIROP-Birth ( $\log[\text{probability}/(1-\text{probability})]$ ), the status (yes/no) and timing (PNA week) of the first retinopathy of prematurity (ROP) diagnosis, weeks since first ROP diagnosis (piecewise linear with break point at 3 weeks), and interactions between the three variables (DIGIROP-Birth probability, PNA week at first ROP and weeks since first ROP) and sex, gestational age (GA) and birth weight standard deviation score (BWSDS) were studied as potential predictors. The break point at 3 weeks for weeks since first ROP diagnosis was defined based on the review of Epanechnikov's hazard functions for ROP treatment. The final model for PNA 6-14 weeks included following predictors: log-odds for DIGIROP-Birth, status (yes/no) for first ROP diagnosis, (timing for first ROP diagnosis) \* (status for first ROP diagnosis), (timing for first ROP diagnosis) \* (status for first ROP diagnosis) \* (log-odds for DIGIROP-Birth). For simplicity and consistency reasons across the time points, the final models for PNA 6-14 weeks included the same set of variables, even though not all prediction variables were significant at all time points. The logistic regression models were tested for goodness-of-fit using Hosmer-Lemeshow test and were all non-significant, i.e. the observed vs estimated number of events in 10 strata were well calibrated. The selected models for DevGroup are presented in the eTable 3.

GA- and PNA-specific cut-offs based on estimated probabilities for reaching 100% sensitivity in DevGroup (or maximum risk estimation of 0.05) were obtained and saved for use in ValGroups (eTable 4). Parameter estimates, standard errors and p-values from the multivariable logistic models are described along with the area under the receiver operating characteristic curve (AUC). Sensitivity, specificity and cumulative specificity (calculated as union of specificities from the prediction model at birth and up to a certain PNA model) over PNA with 95% confidence interval (CI) based on selected cut-offs were the main measures.

### Internal validation

Internal validation was performed applying 10-fold cross-validation. Cumulative specificity was obtained based on estimated probabilities from the cross-validation data set using cut-offs for 100% sensitivity. The certainty of the performance of the internal validation was presented as range of specificities obtained using 10 randomly selected seeds.

### External validation

The predicted probabilities were calculated as:

$1/(1+e^{-LC})$ , where LC is the linear predictor for a vector X of explanatory variables, i.e.

$LC = \alpha + \beta X$ ;  $\alpha$  is intercept;  $\beta$  is a vector of parameter estimates for each explanatory variable.

External validation was performed together for all four external validation groups (ValGroups). AUC with 95% CI, sensitivity, specificity and cumulative specificity with 95% CI were calculated based on cut-offs obtained from the DevGroup.

Graphical illustration of the clinical implication of DIGIROP-Screen prediction tool was made presenting number of infants released from screening for ROP over postnatal ages based on actual ROP screening performed (based on last date for ROP examination), and predictions from DIGIROP-Screen in DevGroup and ValGroups.

### Comparison to other retinopathy of prematurity prediction models

The two US external validation cohort files provided weekly weights that were applied in the algorithms for four existing prediction models, Children's Hospital of Philadelphia-ROP (CHOP-ROP), Omaha-ROP (OMA-ROP), weight, insulin-like growth factor 1, neonatal, ROP (WINROP) and Colorado-ROP (CO-ROP).

Sensitivity and cumulative specificity/specificity with 95% CI were calculated based on each model's recommended cut-offs based on estimated probabilities.

## **eAppendix 2. Supplementary figures and tables**

## eFigure 1. Work-flow for DIGIROP-Screen and four comparison models

Illustration: Aldina Pivodic (first author)

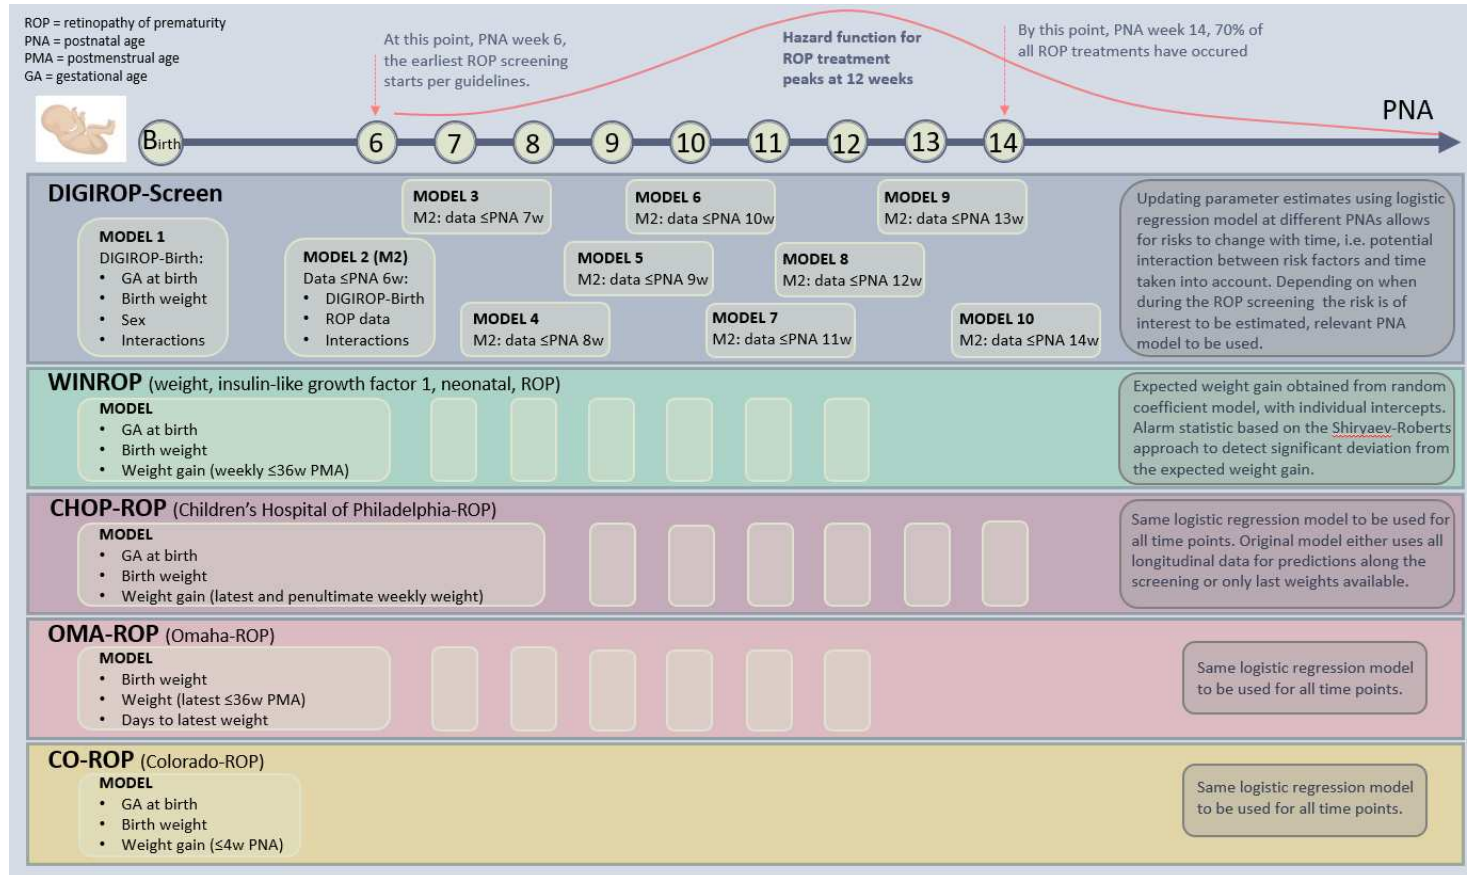

**eFigure 2. Estimated probabilities at birth (A) and over postnatal ages (PNA) 6-14 weeks (B-J) using DIGIROP-Screen for model development group (N=6991)**

These figures show the estimated probabilities at birth and over postnatal ages obtained from DIGIROP-Screen. Y-axis has the logarithmic scale in order to be distinguish low probabilities.

A

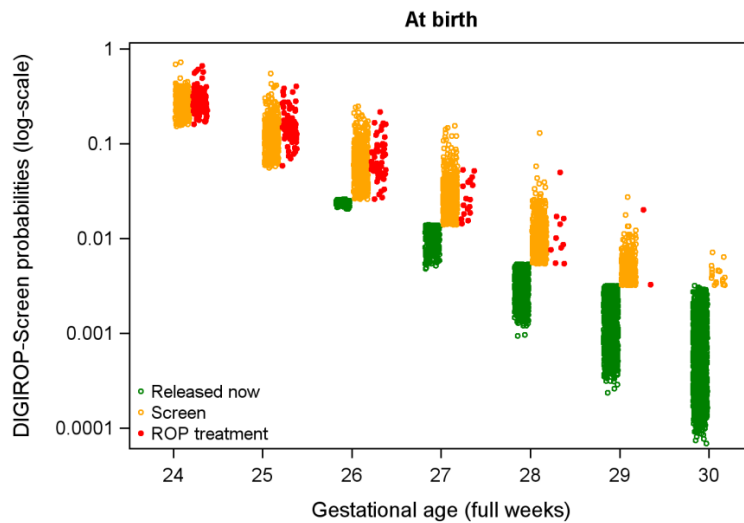

B

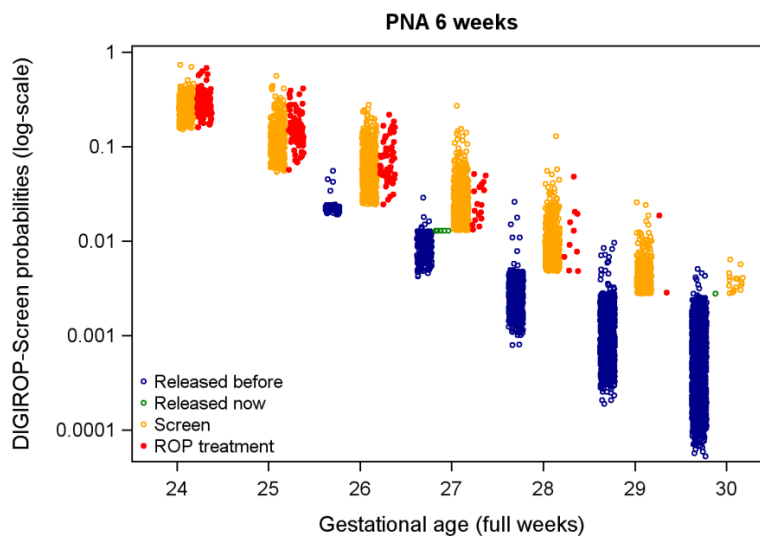

C

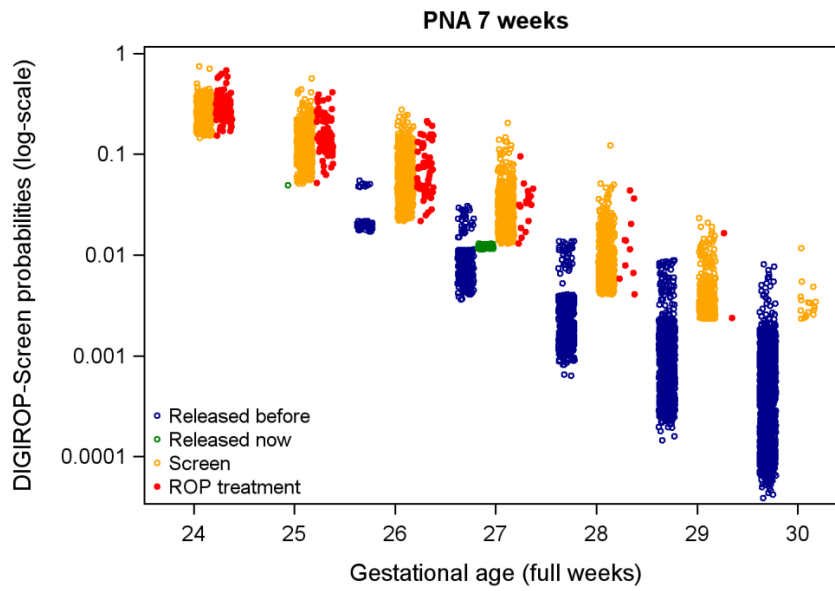

D

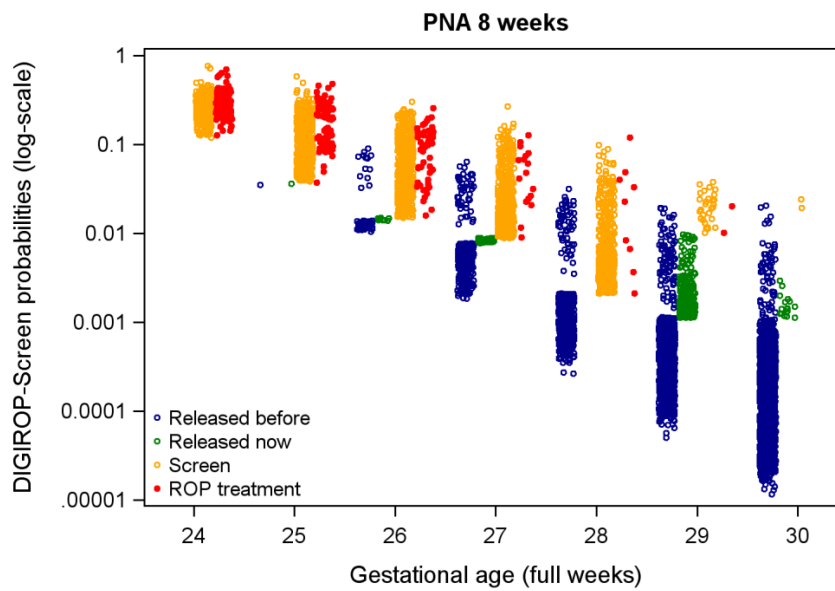

E

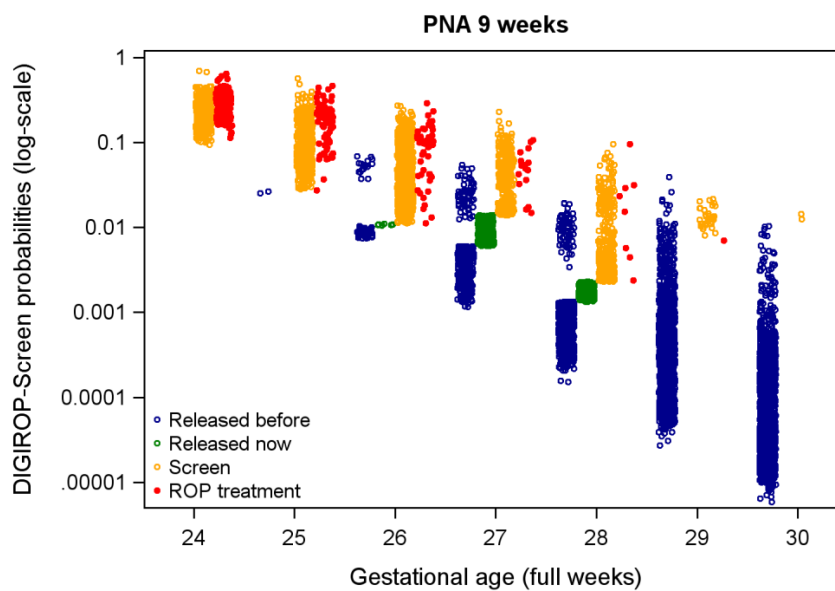

F

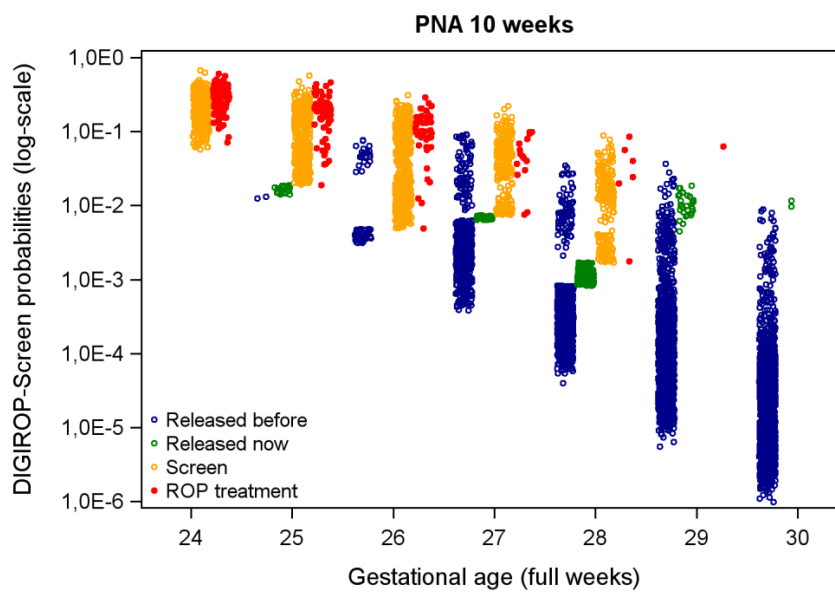



G

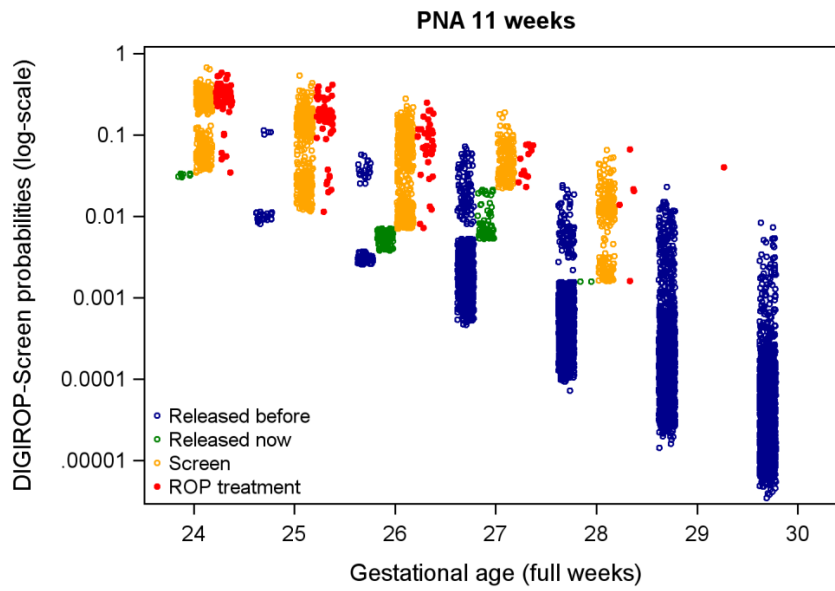

H

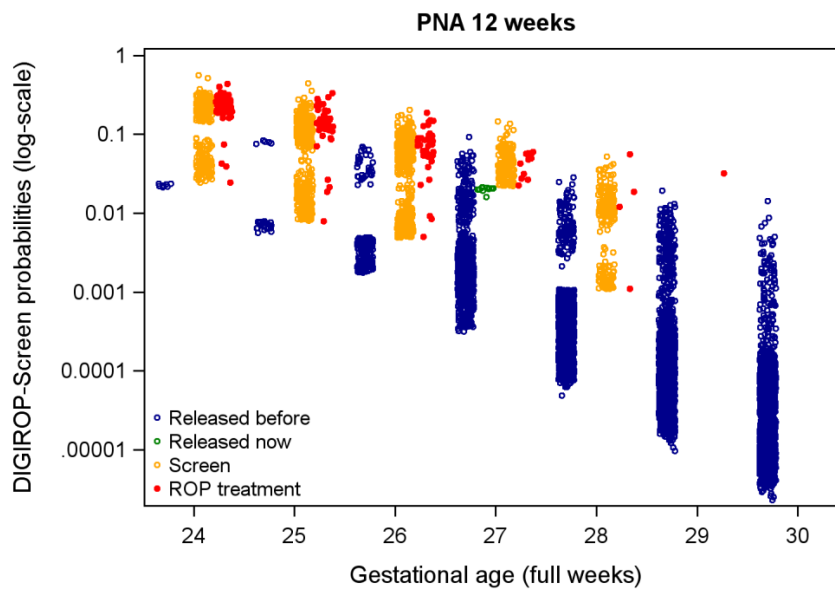

I

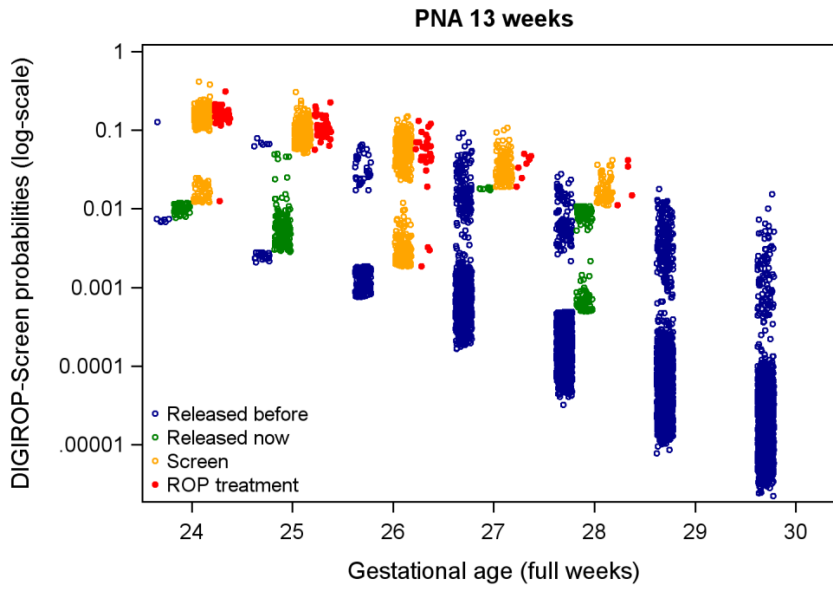

J

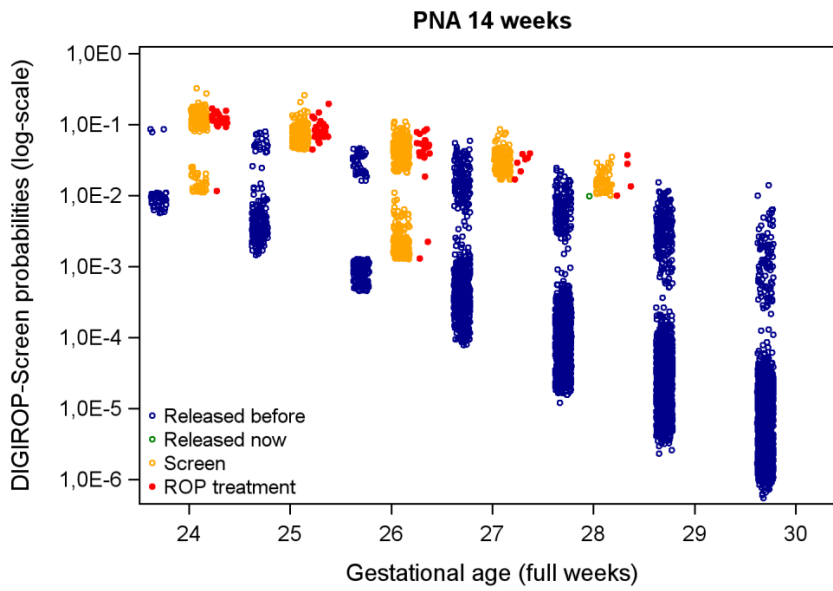

**eFigure 3. Area under the receiver operating characteristic curve (AUC) for prediction models at birth and postnatal ages (PNA) at 6, 8, 10, 12 weeks for model development group (N=6991)**

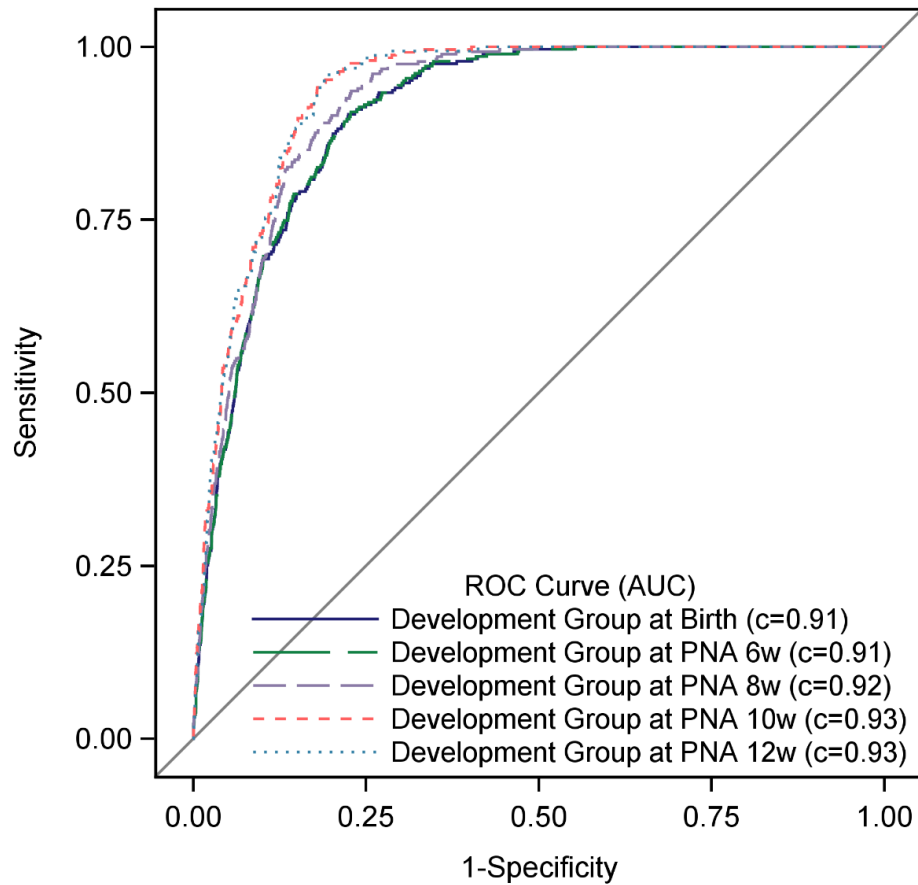

**eFigure 4. Specificity (A) and cumulative specificity (B) with 95% CI obtained using cut-offs based on estimated probabilities for 100% sensitivity over postnatal ages 6-14 weeks for model development group (N=6991)**

Cumulative specificity at a certain postnatal age is calculated as a union of specificities up to and including that certain postnatal age. Cumulative specificity means here the percentage of infants that are not requiring treatment that might be released based on DIGIROP-Screen if applied continuously over time.

A

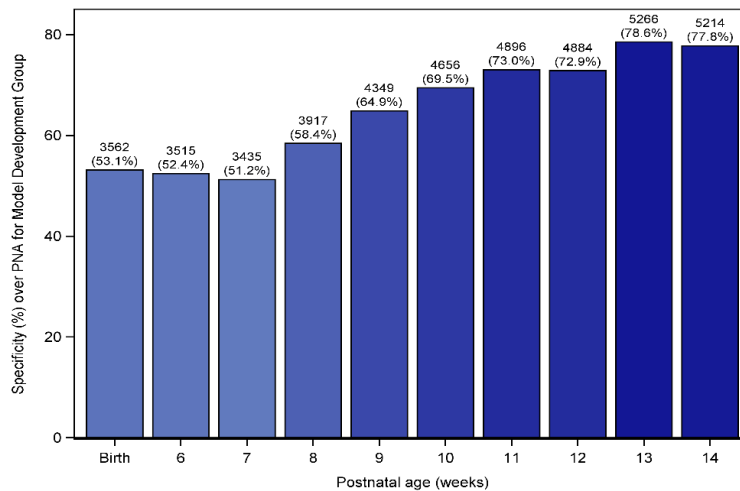

B

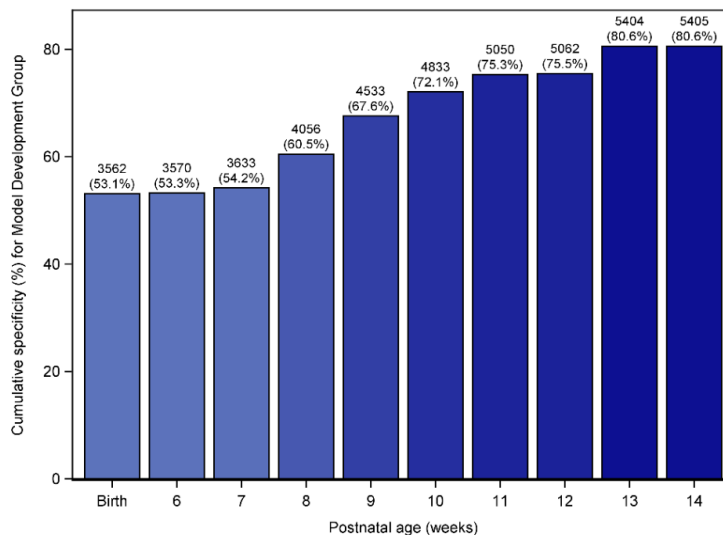

**eFigure 5. Estimated probabilities at birth (A) and over postnatal ages (PNA) 6-14 weeks (B-J) using DIGIROP-Screen for external validation groups (N=1241)**

These figures show the estimated probabilities at birth and over postnatal ages obtained from DIGIROP-Screen. Y-axis has the logarithmic scale in order to be distinguish low probabilities.

A

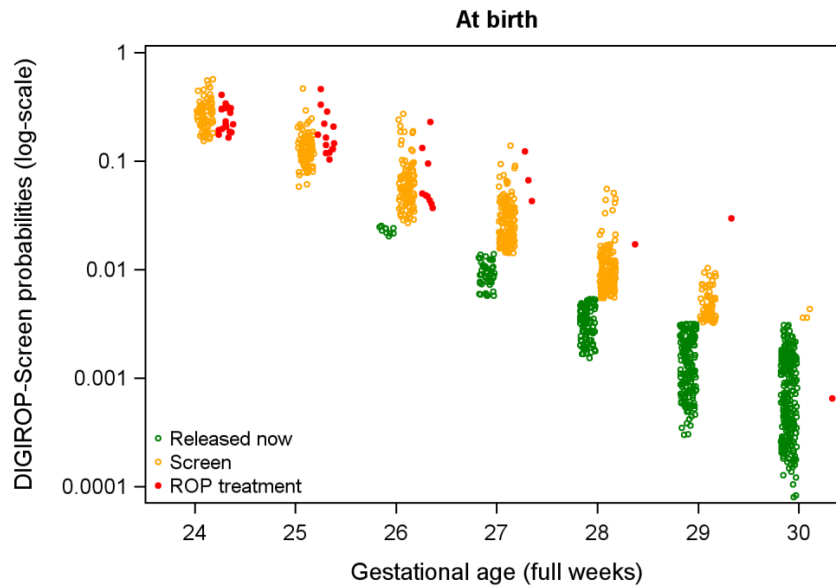

B

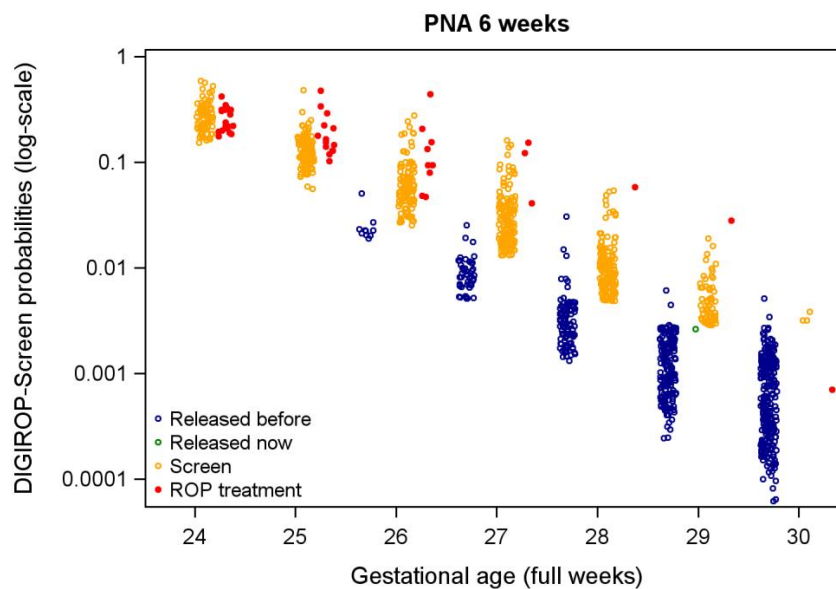

C

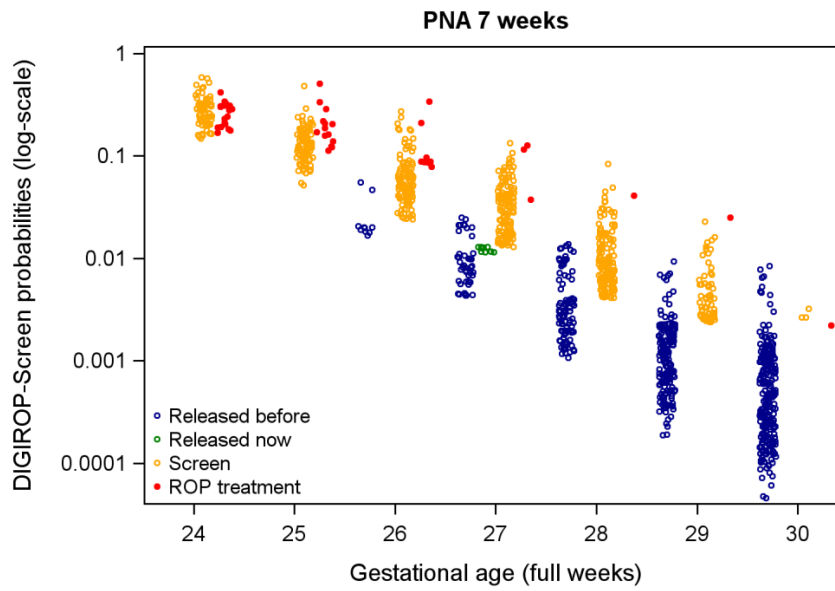

D

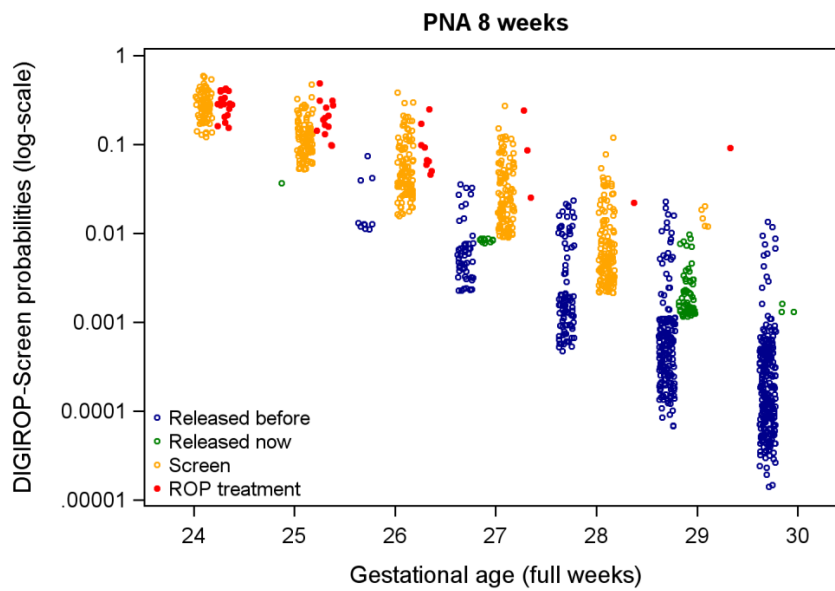

E

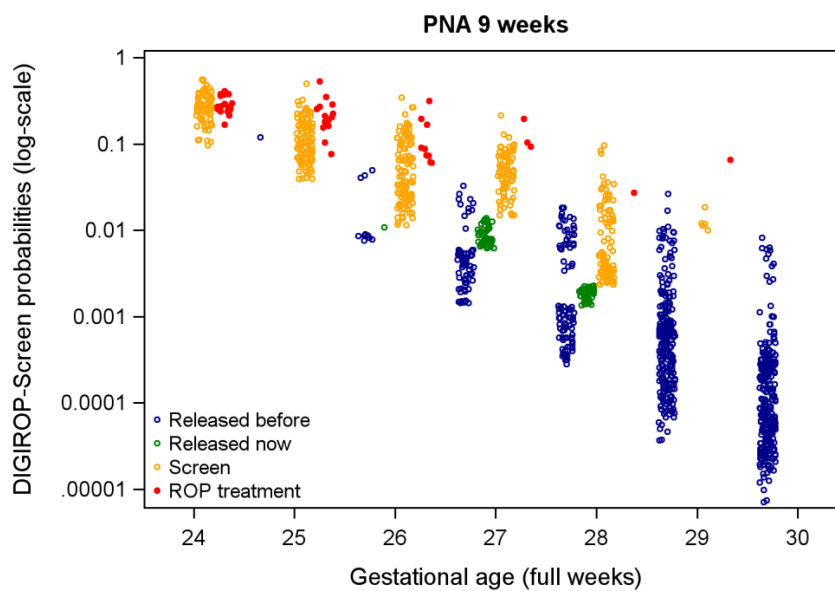

F

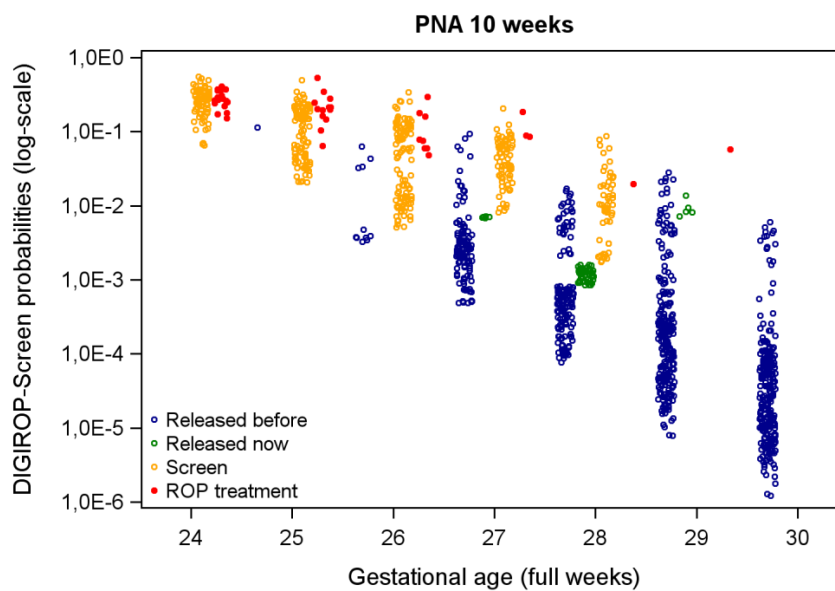

G

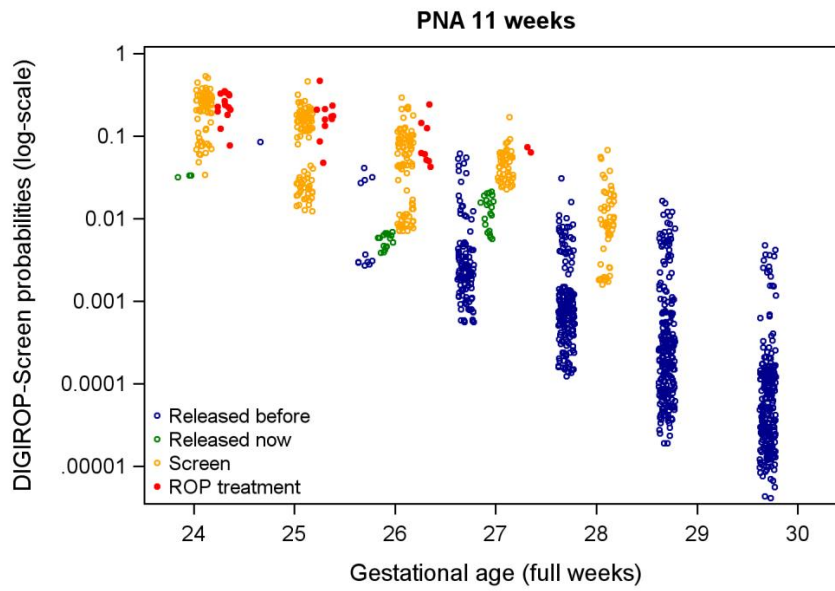

H

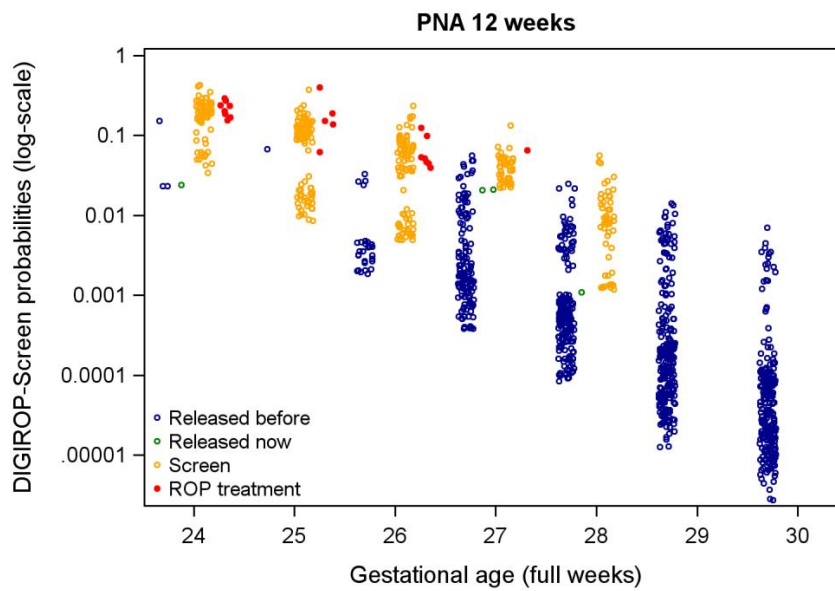



I

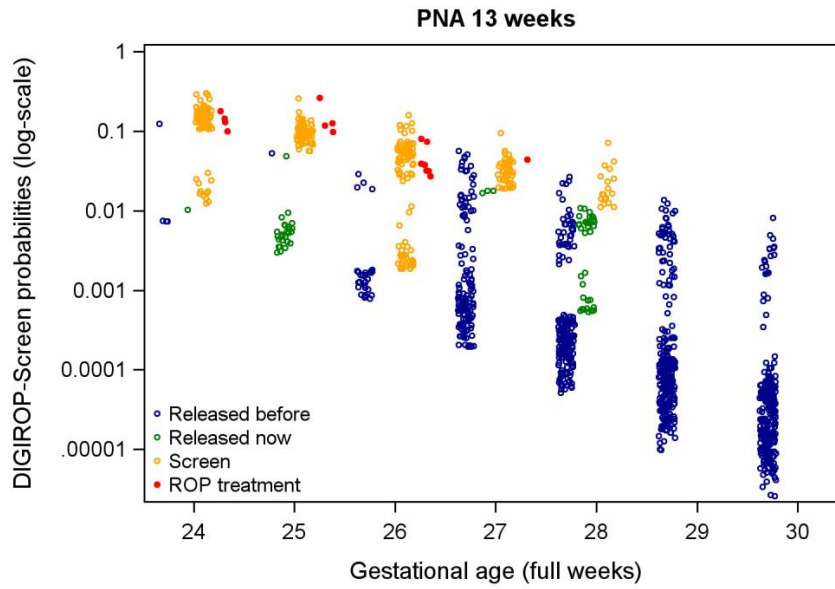

J

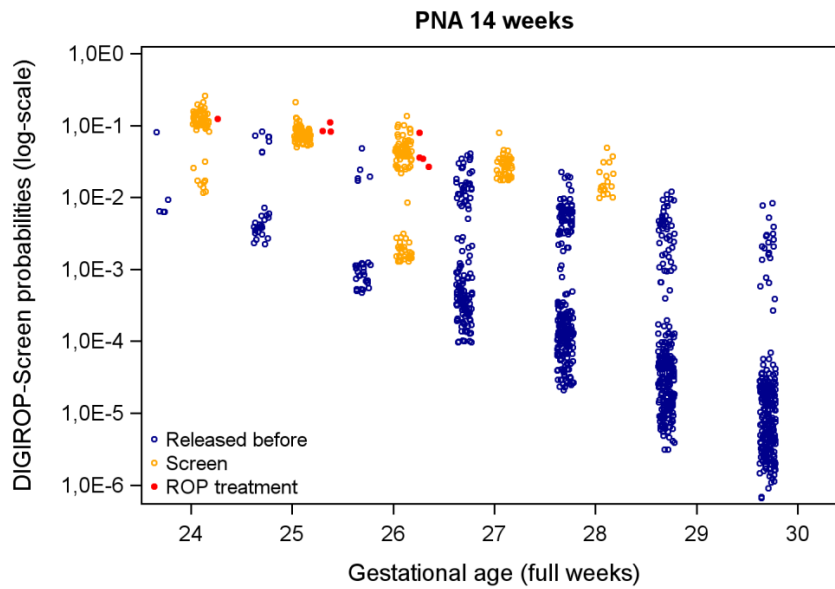

**eFigure 6. Specificity (A) and cumulative specificity (B) with 95% CI obtained using cut-offs based on estimated probabilities for 100% sensitivity over postnatal ages 6-14 weeks for external validation groups (N=1241)**

Cumulative specificity at a certain postnatal age is calculated as a union of specificities up to and including that certain postnatal age. Cumulative specificity means here the percentage of infants that are not requiring treatment that might be released based on DIGIROP-Screen if applied continuously over time.

A

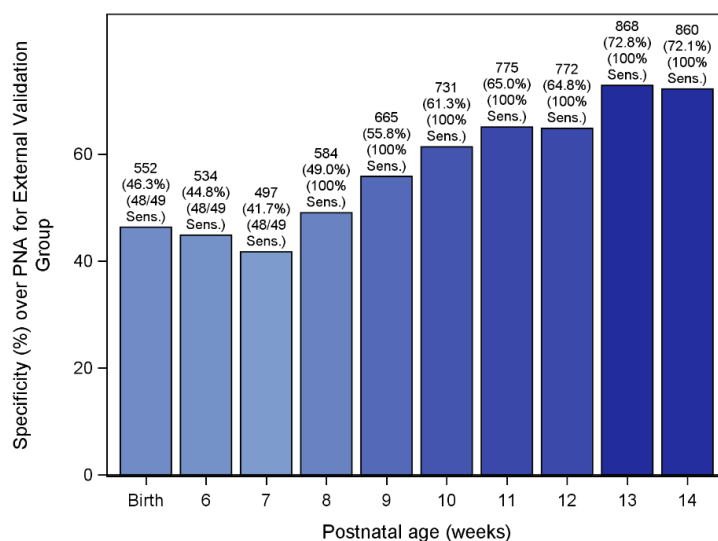

B

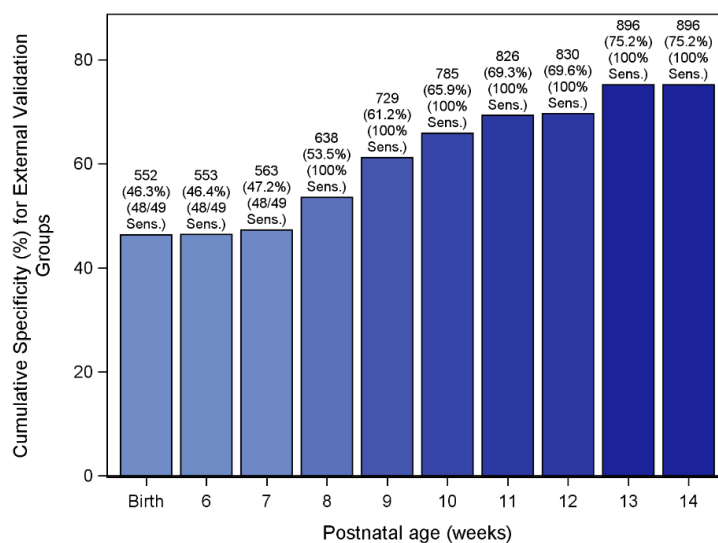

**eFigure 7. Infants released from screening for retinopathy of prematurity (ROP) over postnatal ages for infants born 24-30 Weeks of gestational age according to actual ROP screening performed, and risk predictions from DIGIROP-Screen in model development group (DevGroup) and validation groups (ValGroups).**

This figure shows the effect of the DIGIROP-Screen prediction tool from birth and applied over the screening process. Comparing to the release from screening based on actual/observed data in SWEDROP, large proportion of infants might be safely released already at birth with the use of DIGIROP-Screen. The n and % are presented for time points: birth, PNA 7, 9, 11, and 13 weeks.

**DevGroup - Infants released from ROP screening according to SWEDROP data**

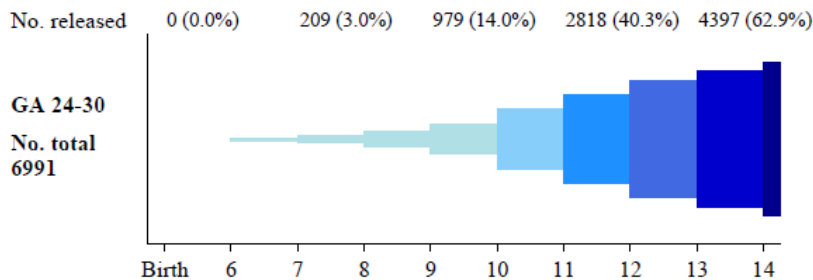

**DevGroup - Infants released from ROP screening based on DIGIROP-Screen**

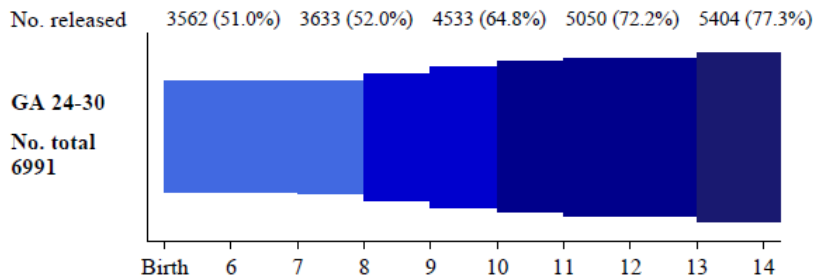

**ValGroups - Infants released from ROP screening based on DIGIROP-Screen**

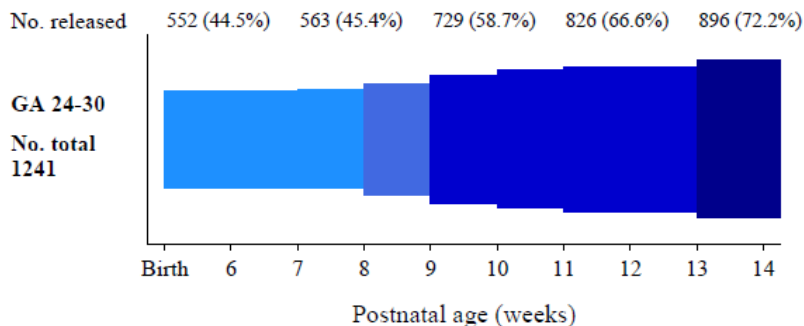

Infants released from ROP screening

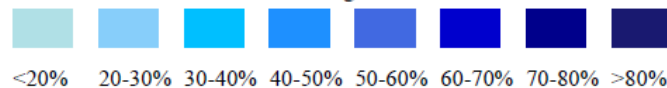

**eFigure 8. Follow-up of infants using DIGIROP-Screen**

This figures show example infants and the information that might be obtained and showed based on the observed data. Infant's characteristics, the estimated probabilities in relation to probabilities for other infants with reported data in SWEDROP born the same week, and the outcome based on DIGIROP-Screen prediction whether the infant should be screened och released from the screening.

A

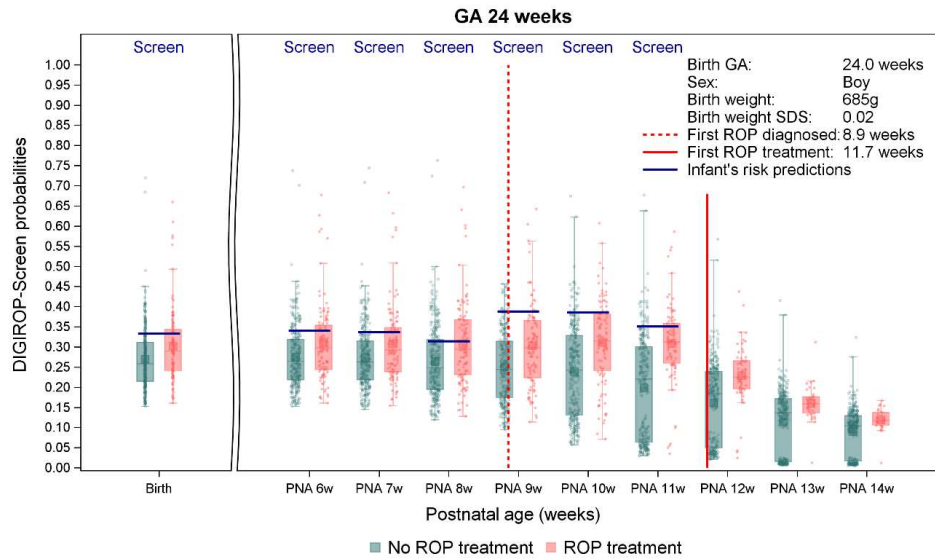

B

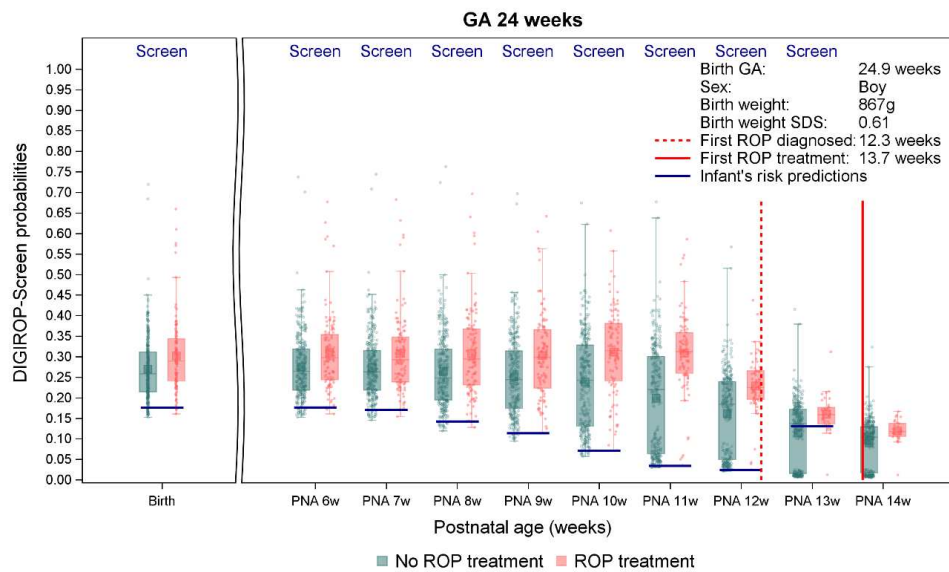

C

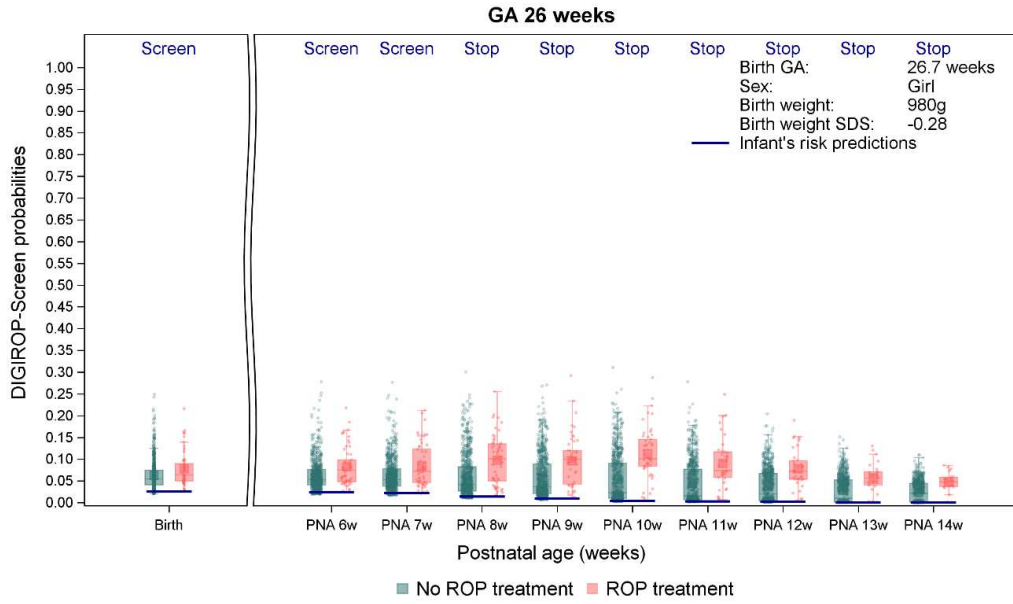

D

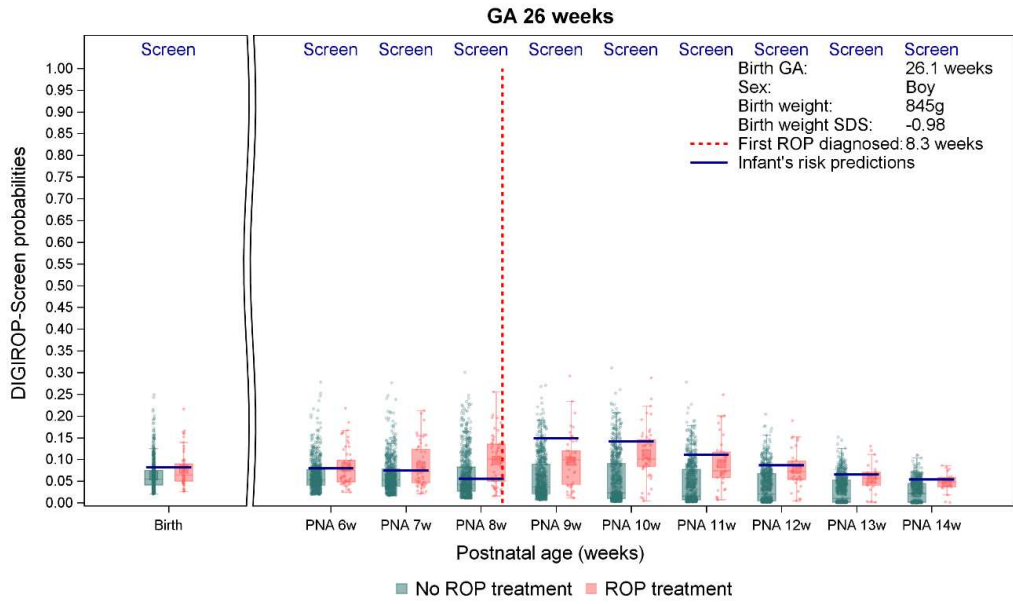

E

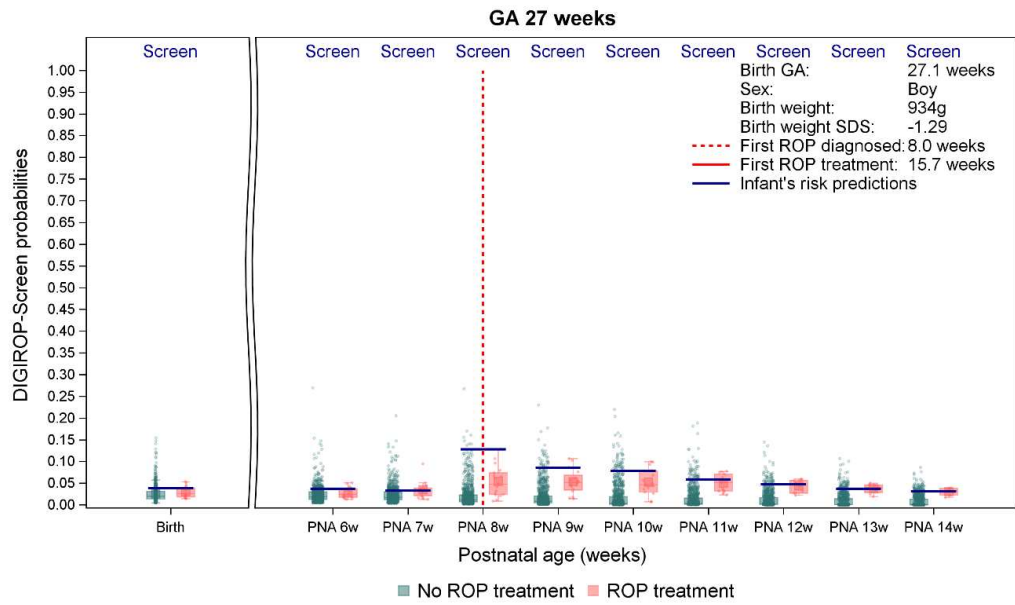

F

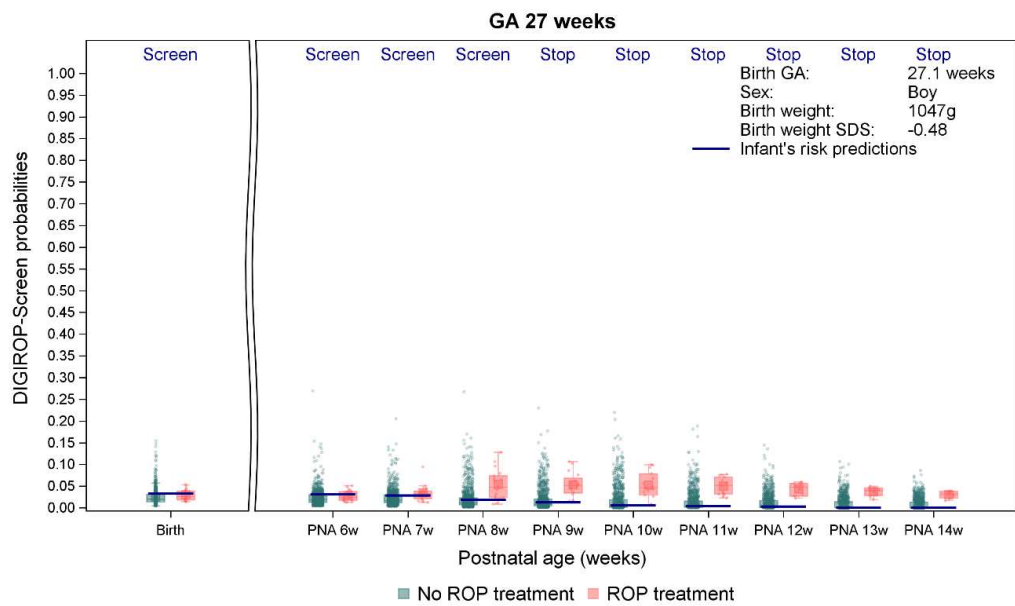

**eTable 1. Infants' characteristics at birth, first sign of retinopathy of prematurity and retinopathy of prematurity treatment for model development group and four external validation cohorts**

| Variable                                                          | Model development group (n=6991)              | Temporal (SWEDROP) validation group (n=314)  | External (German) validation group (n=322)   | External (BIDMC) validation group (n=258)    | External (Utah) validation group (n=347)     |
|-------------------------------------------------------------------|-----------------------------------------------|----------------------------------------------|----------------------------------------------|----------------------------------------------|----------------------------------------------|
| <b>Sex</b>                                                        |                                               |                                              |                                              |                                              |                                              |
| Boys                                                              | 3833 (54.8%)                                  | 158 (50.3%)                                  | 178 (55.3%)                                  | 126 (48.8%)                                  | 172 (49.6%)                                  |
| Girls                                                             | 3158 (45.2%)                                  | 156 (49.7%)                                  | 144 (44.7%)                                  | 132 (51.2%)                                  | 175 (50.4%)                                  |
| <b>Gestational age at birth (weeks)</b>                           | 28.3 (1.9)<br>28.6 (24.0; 30.9)<br>n=6991     | 28.6 (1.7)<br>29.0 (24.0; 30.9)<br>n=314     | 28.1 (1.8)<br>28.4 (24.0; 30.9)<br>n=322     | 28.1 (2.0)<br>28.6 (24.0; 30.9)<br>n=258     | 27.5 (1.7)<br>27.9 (24.0; 30.7)<br>n=347     |
| <b>Gestational age (full weeks)</b>                               |                                               |                                              |                                              |                                              |                                              |
| 24                                                                | 427 (6.1%)                                    | 10 (3.2%)                                    | 27 (8.4%)                                    | 24 (9.3%)                                    | 33 (9.5%)                                    |
| 25                                                                | 597 (8.5%)                                    | 24 (7.6%)                                    | 27 (8.4%)                                    | 22 (8.5%)                                    | 41 (11.8%)                                   |
| 26                                                                | 781 (11.2%)                                   | 28 (8.9%)                                    | 29 (9.0%)                                    | 28 (10.9%)                                   | 44 (12.7%)                                   |
| 27                                                                | 914 (13.1%)                                   | 40 (12.7%)                                   | 38 (11.8%)                                   | 41 (15.9%)                                   | 68 (19.6%)                                   |
| 28                                                                | 1141 (16.3%)                                  | 48 (15.3%)                                   | 76 (23.6%)                                   | 31 (12.0%)                                   | 84 (24.2%)                                   |
| 29                                                                | 1419 (20.3%)                                  | 74 (23.6%)                                   | 62 (19.3%)                                   | 48 (18.6%)                                   | 52 (15.0%)                                   |
| 30                                                                | 1712 (24.5%)                                  | 90 (28.7%)                                   | 63 (19.6%)                                   | 64 (24.8%)                                   | 25 (7.2%)                                    |
| <b>Birth weight (g)</b>                                           | 1146 (339)<br>1135 (307; 3245)<br>n=6991      | 1175 (332)<br>1173 (390; 2300)<br>n=314      | 1036 (309)<br>1038 (335; 2450)<br>n=322      | 1076 (338)<br>1053 (400; 2240)<br>n=258      | 994 (273)<br>1000 (410; 1760)<br>n=347       |
| <b>Birth weight SDS (Niklasson &amp; Albertsson-Wikland 2008)</b> | -1.03 (1.37)<br>-0.77 (-8.56; 4.93)<br>n=6991 | -1.08 (1.50)<br>-0.76 (-6.93; 2.16)<br>n=314 | -1.56 (1.55)<br>-1.25 (-9.92; 2.75)<br>n=322 | -1.30 (1.53)<br>-0.99 (-7.30; 2.43)<br>n=258 | -1.28 (1.65)<br>-0.97 (-7.61; 2.13)<br>n=347 |
| <b>Birth year</b>                                                 |                                               |                                              |                                              |                                              |                                              |

| Variable                                                                                                                                                                                   | Model development group (n=6991)            | Temporal (SWEDROP) validation group (n=314) | External (German) validation group (n=322) | External (BIDMC) validation group (n=258)  | External (Utah) validation group (n=347)   |
|--------------------------------------------------------------------------------------------------------------------------------------------------------------------------------------------|---------------------------------------------|---------------------------------------------|--------------------------------------------|--------------------------------------------|--------------------------------------------|
| <b>2006-2007</b>                                                                                                                                                                           | 543 (7.8%)                                  | 0 (0.0%)                                    | 0 (0.0%)                                   | 139 (53.9%)                                | 0 (0.0%)                                   |
| <b>2008-2009</b>                                                                                                                                                                           | 1331 (19.0%)                                | 0 (0.0%)                                    | 0 (0.0%)                                   | 119 (46.1%)                                | 0 (0.0%)                                   |
| <b>2010-2011</b>                                                                                                                                                                           | 1303 (18.6%)                                | 0 (0.0%)                                    | 9 (2.8%)                                   | 0 (0.0%)                                   | 0 (0.0%)                                   |
| <b>2012-2013</b>                                                                                                                                                                           | 1369 (19.6%)                                | 0 (0.0%)                                    | 103 (32.0%)                                | 0 (0.0%)                                   | 0 (0.0%)                                   |
| <b>2014-2015</b>                                                                                                                                                                           | 1445 (20.7%)                                | 0 (0.0%)                                    | 118 (36.6%)                                | 0 (0.0%)                                   | 131 (37.8%)                                |
| <b>2016-2017</b>                                                                                                                                                                           | 1000 (14.3%)                                | 115 (36.6%)                                 | 92 (28.6%)                                 | 0 (0.0%)                                   | 124 (35.7%)                                |
| <b>2018-2019</b>                                                                                                                                                                           | 0 (0.0%)                                    | 199 (63.4%)                                 | 0 (0.0%)                                   | 0 (0.0%)                                   | 92 (26.5%)                                 |
| <b>Any ROP</b>                                                                                                                                                                             | 2026 (29.0%)                                | 93 (29.6%)                                  | 118 (36.6%)                                | 116 (45.0%)                                | 175 (50.4%)                                |
| <b>Postnatal age at first diagnosed ROP (weeks)</b>                                                                                                                                        | 8.35 (2.23)<br>8.14 (3.43; 18.71)<br>n=2026 | 7.83 (2.32)<br>7.71 (4.43; 17.57)<br>n=93   | 8.95 (2.72)<br>8.36 (4.86; 19.00)<br>n=118 | 7.81 (1.86)<br>7.93 (3.86; 13.29)<br>n=116 | 7.78 (2.85)<br>7.29 (3.14; 18.29)<br>n=175 |
| <b>ROP treatment</b>                                                                                                                                                                       | 287 (4.1%)                                  | 11 (3.5%)                                   | 12 (3.7%)                                  | 6 (2.3%)                                   | 20 (5.8%)                                  |
| <b>Postnatal age at ROP treatment (weeks)</b>                                                                                                                                              | 12.8 (2.8)<br>12.4 (7.0; 21.9)<br>n=287     | 13.2 (2.3)<br>11.9 (10.7; 17.6)<br>n=11     | 11.6 (1.3)<br>11.0 (10.0; 14.4)<br>n=12    | 13.5 (3.3)<br>13.1 (10.7; 19.6)<br>n=6     | 12.0 (2.5)<br>11.5 (7.1; 19.4)<br>n=20     |
| ROP=retinopathy of prematurity; SDS=standard deviation score<br>For categorical variables n (%) is presented.<br>For continuous variables Mean (SD) / Median (Min; Max) / n= is presented. |                                             |                                             |                                            |                                            |                                            |



**eTable 2. Infants' characteristics at birth, first sign of retinopathy of prematurity and retinopathy of prematurity treatment for model development group and external validation groups for infants with and without retinopathy of prematurity treatment**

|                                                                   | Model development group                       |                                              | Validation groups                             |                                             |
|-------------------------------------------------------------------|-----------------------------------------------|----------------------------------------------|-----------------------------------------------|---------------------------------------------|
|                                                                   | No ROP treatment                              | ROP treatment                                | No ROP treatment                              | ROP treatment                               |
|                                                                   | n=6704                                        | n=287                                        | n=1192                                        | n=49                                        |
| <b>Sex</b>                                                        |                                               |                                              |                                               |                                             |
| <b>Boys</b>                                                       | 3656 (54.5%)                                  | 177 (61.7%)                                  | 604 (50.7%)                                   | 30 (61.2%)                                  |
| <b>Girls</b>                                                      | 3048 (45.5%)                                  | 110 (38.3%)                                  | 588 (49.3%)                                   | 19 (38.8%)                                  |
| <b>Gestational age at birth (weeks)</b>                           | 28.4 (1.8)<br>28.7 (24.0; 30.9)<br>n=6704     | 25.4 (1.2)<br>25.1 (24.0; 29.6)<br>n=287     | 28.2 (1.8)<br>28.4 (24.0; 30.9)<br>n=1192     | 25.6 (1.3)<br>25.1 (24.0; 30.4)<br>n=49     |
| <b>Gestational age (full weeks)</b>                               |                                               |                                              |                                               |                                             |
| <b>24</b>                                                         | 314 (4.7%)                                    | 113 (39.4%)                                  | 74 (6.2%)                                     | 20 (40.8%)                                  |
| <b>25</b>                                                         | 510 (7.6%)                                    | 87 (30.3%)                                   | 100 (8.4%)                                    | 14 (28.6%)                                  |
| <b>26</b>                                                         | 724 (10.8%)                                   | 57 (19.9%)                                   | 120 (10.1%)                                   | 9 (18.4%)                                   |
| <b>27</b>                                                         | 896 (13.4%)                                   | 18 (6.3%)                                    | 184 (15.4%)                                   | 3 (6.1%)                                    |
| <b>28</b>                                                         | 1131 (16.9%)                                  | 10 (3.5%)                                    | 238 (20.0%)                                   | 1 (2.0%)                                    |
| <b>29</b>                                                         | 1417 (21.1%)                                  | 2 (0.7%)                                     | 235 (19.7%)                                   | 1 (2.0%)                                    |
| <b>30</b>                                                         | 1712 (25.5%)                                  | 0 (0.0%)                                     | 241 (20.2%)                                   | 1 (2.0%)                                    |
| <b>Birth weight (g)</b>                                           | 1163 (334)<br>1155 (307; 3245)<br>n=6704      | 741 (174)<br>728 (370; 1700)<br>n=287        | 1083 (315)<br>1080 (335; 2450)<br>n=1192      | 711 (178)<br>690 (390; 1090)<br>n=49        |
| <b>Birth weight SDS (Niklasson &amp; Albertsson-Wikland 2008)</b> | -1.03 (1.36)<br>-0.77 (-8.56; 4.93)<br>n=6704 | -1.16 (1.50)<br>-0.78 (-8.06; 2.84)<br>n=287 | -1.29 (1.54)<br>-0.99 (-7.61; 2.75)<br>n=1192 | -1.59 (2.27)<br>-1.03 (-9.92; 1.72)<br>n=49 |
| <b>Birth year</b>                                                 |                                               |                                              |                                               |                                             |
| <b>2006-2007</b>                                                  | 520 (7.8%)                                    | 23 (8.0%)                                    | 135 (11.3%)                                   | 4 (8.2%)                                    |
| <b>2008-2009</b>                                                  | 1283 (19.1%)                                  | 48 (16.7%)                                   | 117 (9.8%)                                    | 2 (4.1%)                                    |
| <b>2010-2011</b>                                                  | 1243 (18.5%)                                  | 60 (20.9%)                                   | 8 (0.7%)                                      | 1 (2.0%)                                    |
| <b>2012-2013</b>                                                  | 1326 (19.8%)                                  | 43 (15.0%)                                   | 96 (8.1%)                                     | 7 (14.3%)                                   |
| <b>2014-2015</b>                                                  | 1378 (20.6%)                                  | 67 (23.3%)                                   | 240 (20.1%)                                   | 9 (18.4%)                                   |
| <b>2016-2017</b>                                                  | 954 (14.2%)                                   | 46 (16.0%)                                   | 315 (26.4%)                                   | 16 (32.7%)                                  |
| <b>2018-2019</b>                                                  |                                               |                                              | 281 (23.6%)                                   | 10 (20.4%)                                  |
| <b>Any ROP</b>                                                    | 1739 (25.9%)                                  | 287 (100.0%)                                 | 453 (38.0%)                                   | 49 (100.0%)                                 |
| <b>Postnatal age for first diagnosed ROP (weeks)</b>              | 8.30 (2.29)<br>8.00 (3.43; 18.71)<br>n=1739   | 8.68 (1.74)<br>8.43 (4.43; 15.14)<br>n=287   | 8.12 (2.61)<br>7.86 (3.14; 19.00)<br>n=453    | 7.63 (1.99)<br>7.43 (4.29; 12.14)<br>n=49   |

|                                                                                                                                                                                            | Model development group |                                         | Validation groups |                                        |
|--------------------------------------------------------------------------------------------------------------------------------------------------------------------------------------------|-------------------------|-----------------------------------------|-------------------|----------------------------------------|
|                                                                                                                                                                                            | No ROP treatment        | ROP treatment                           | No ROP treatment  | ROP treatment                          |
| <b>Postnatal age for ROP treatment (weeks)</b>                                                                                                                                             |                         | 12.8 (2.8)<br>12.4 (7.0; 21.9)<br>n=287 |                   | 12.3 (2.4)<br>11.9 (7.1; 19.6)<br>n=49 |
| ROP=retinopathy of prematurity; SDS=standard deviation score<br>For categorical variables n (%) is presented.<br>For continuous variables Mean (SD) / Median (Min; Max) / n= is presented. |                         |                                         |                   |                                        |

**eTable 3. Final prediction models in model development group for postnatal ages 6-14 weeks (N=6991)**

| Model for:   | n events/N infants | Variables                                        | Estimate (SE)    | p-value | Hosmer-Lemeshow goodness-of-fit test p-value |
|--------------|--------------------|--------------------------------------------------|------------------|---------|----------------------------------------------|
| PNA 6 weeks  | 287/6991           | Intercept                                        | 0.0560 (0.1263)  | 0.66    | 0.72                                         |
|              |                    | logodds(DIGIROP-Birth)                           | 1.0336 (0.0557)  | <.0001  |                                              |
|              |                    | FirstROP                                         | 5.0363 (4.3698)  | 0.25    |                                              |
|              |                    | FirstROP x FirstROPWeek                          | -0.7783 (0.7457) | 0.30    |                                              |
|              |                    | logodds(DIGIROP-Birth) x FirstROP x FirstROPWeek | 0.0138 (0.0589)  | 0.82    |                                              |
| PNA 7 weeks  | 287/6991           | Intercept                                        | 0.0618 (0.1324)  | 0.64    | 0.53                                         |
|              |                    | logodds(DIGIROP-Birth)                           | 1.0666 (0.0598)  | <.0001  |                                              |
|              |                    | FirstROP                                         | 1.3407 (1.8188)  | 0.46    |                                              |
|              |                    | FirstROP x FirstROPWeek                          | -0.1940 (0.2798) | 0.49    |                                              |
|              |                    | logodds(DIGIROP-Birth) x FirstROP x FirstROPWeek | -0.0343 (0.0264) | 0.19    |                                              |
| PNA 8 weeks  | 282/6986           | Intercept                                        | 0.0452 (0.1550)  | 0.77    | 0.55                                         |
|              |                    | logodds(DIGIROP-Birth)                           | 1.1899 (0.0763)  | <.0001  |                                              |
|              |                    | FirstROP                                         | -0.6394 (1.0596) | 0.55    |                                              |
|              |                    | FirstROP x FirstROPWeek                          | 0.1028 (0.1490)  | 0.49    |                                              |
|              |                    | logodds(DIGIROP-Birth) x FirstROP x FirstROPWeek | -0.0648 (0.0172) | 0.0002  |                                              |
| PNA 9 weeks  | 265/6969           | Intercept                                        | -0.1282 (0.1869) | 0.49    | 0.97                                         |
|              |                    | logodds(DIGIROP-Birth)                           | 1.2439 (0.0939)  | <.0001  |                                              |
|              |                    | FirstROP                                         | 0.9040 (0.7407)  | 0.22    |                                              |
|              |                    | FirstROP x FirstROPWeek                          | -0.0817 (0.0976) | 0.40    |                                              |
|              |                    | logodds(DIGIROP-Birth) x FirstROP x FirstROPWeek | -0.0582 (0.0167) | 0.0005  |                                              |
| PNA 10 weeks | 252/6956           | Intercept                                        | -0.3993 (0.2624) | 0.13    | 1.00                                         |
|              |                    | logodds(DIGIROP-Birth)                           | 1.4012 (0.1410)  | <.0001  |                                              |
|              |                    | FirstROP                                         | 1.2090 (0.5869)  | 0.039   |                                              |
|              |                    | FirstROP x FirstROPWeek                          | -0.0857 (0.0765) | 0.26    |                                              |
|              |                    | logodds(DIGIROP-Birth) x FirstROP x FirstROPWeek | -0.0742 (0.0196) | 0.0002  |                                              |
| PNA 11 weeks | 209/6913           | Intercept                                        | -1.5490 (0.3873) | <.0001  | 0.59                                         |
|              |                    | logodds(DIGIROP-Birth)                           | 1.1503 (0.1676)  | <.0001  |                                              |
|              |                    | FirstROP                                         | 1.6573 (0.5623)  | 0.0032  |                                              |
|              |                    | FirstROP x FirstROPWeek                          | -0.0163 (0.0708) | 0.82    |                                              |
|              |                    | logodds(DIGIROP-Birth) x FirstROP x FirstROPWeek | -0.0361 (0.0218) | 0.098   |                                              |
| PNA 12 weeks | 162/6866           | Intercept                                        | -1.9017 (0.4772) | <.0001  | 0.96                                         |
|              |                    | logodds(DIGIROP-Birth)                           | 1.1565 (0.1989)  | <.0001  |                                              |

| Model for:                                                                                                                                                                                                                                         | n events/N infants | Variables                                               | Estimate (SE)    | p-value | Hosmer-Lemeshow goodness-of-fit test p-value |
|----------------------------------------------------------------------------------------------------------------------------------------------------------------------------------------------------------------------------------------------------|--------------------|---------------------------------------------------------|------------------|---------|----------------------------------------------|
|                                                                                                                                                                                                                                                    |                    | <b>FirstROP</b>                                         | 2.0944 (0.5740)  | 0.0003  |                                              |
|                                                                                                                                                                                                                                                    |                    | <b>FirstROP x FirstROPWeek</b>                          | -0.0724 (0.0732) | 0.32    |                                              |
|                                                                                                                                                                                                                                                    |                    | <b>logodds(DIGIROP-Birth) x FirstROP x FirstROPWeek</b> | -0.0427 (0.0246) | 0.082   |                                              |
| <b>PNA 13 weeks</b>                                                                                                                                                                                                                                | <b>114/6818</b>    | <b>Intercept</b>                                        | -3.3040 (0.7853) | <.0001  | 1.00                                         |
|                                                                                                                                                                                                                                                    |                    | <b>logodds(DIGIROP-Birth)</b>                           | 1.0138 (0.2733)  | 0.0002  |                                              |
|                                                                                                                                                                                                                                                    |                    | <b>FirstROP</b>                                         | 2.4864 (0.7244)  | 0.0006  |                                              |
|                                                                                                                                                                                                                                                    |                    | <b>FirstROP x FirstROPWeek</b>                          | -0.0179 (0.0860) | 0.84    |                                              |
|                                                                                                                                                                                                                                                    |                    | <b>logodds(DIGIROP-Birth) x FirstROP x FirstROPWeek</b> | -0.0377 (0.0320) | 0.24    |                                              |
| <b>PNA 14 weeks</b>                                                                                                                                                                                                                                | <b>90/6794</b>     | <b>Intercept</b>                                        | -3.2182 (0.8548) | 0.0002  | 1.00                                         |
|                                                                                                                                                                                                                                                    |                    | <b>logodds(DIGIROP-Birth)</b>                           | 1.1678 (0.3182)  | 0.0002  |                                              |
|                                                                                                                                                                                                                                                    |                    | <b>FirstROP</b>                                         | 3.0547 (0.7960)  | 0.0001  |                                              |
|                                                                                                                                                                                                                                                    |                    | <b>FirstROP x FirstROPWeek</b>                          | -0.1294 (0.0977) | 0.19    |                                              |
|                                                                                                                                                                                                                                                    |                    | <b>logodds(DIGIROP-Birth) x FirstROP x FirstROPWeek</b> | -0.0599 (0.0366) | 0.10    |                                              |
| ROP=retinopathy of prematurity; PNA=postnatal age; logodds(DIGIROP-Birth)=log([DIGIROP-Birth risk estimate]/(1-[DIGIROP-Birth risk estimate])); FirstROP=first ROP diagnosed no(0)/yes(1); FirstROPWeek=postnatal week when first ROP is diagnosed |                    |                                                         |                  |         |                                              |

**eTable 4. Gestational age-specific cut-offs (estimated probabilities for retinopathy of prematurity treatment) based on DIGIROP-Screen in model development group (N=6991)**

Each column (Birth and PNA 6-14 weeks) represents a separate prediction model

| GA at birth | Birth  | PNA 6 weeks | PNA 7 weeks | PNA 8 weeks | PNA 9 weeks | PNA 10 weeks | PNA 11 weeks | PNA 12 weeks | PNA 13 weeks | PNA 14 weeks |
|-------------|--------|-------------|-------------|-------------|-------------|--------------|--------------|--------------|--------------|--------------|
| 24          | 0.05   | 0.05        | 0.05        | 0.05        | 0.05        | 0.05         | 0.034        | 0.024        | 0.012        | 0.011        |
| 25          | 0.05   | 0.05        | 0.05        | 0.037       | 0.027       | 0.019        | 0.011        | 0.0079       | 0.05         | 0.044        |
| 26          | 0.026  | 0.024       | 0.021       | 0.015       | 0.011       | 0.0049       | 0.0071       | 0.0049       | 0.0018       | 0.0012       |
| 27          | 0.014  | 0.013       | 0.013       | 0.0089      | 0.014       | 0.0075       | 0.022        | 0.022        | 0.019        | 0.016        |
| 28          | 0.0054 | 0.0048      | 0.004       | 0.0021      | 0.0023      | 0.0017       | 0.0016       | 0.0011       | 0.011        | 0.0099       |
| 29 (and 30) | 0.0032 | 0.0028      | 0.0023      | 0.01        | 0.0069      | 0.05         | 0.04         | 0.032        | 0.011        | 0.0099       |

ROP=retinopathy of prematurity; GA=gestational age; PNA=postnatal age

**eTable 5. Area under the receiver operating characteristic curve (AUC) with 95% CI at birth and over postnatal ages 6-14 weeks for model development group (N=6991), internal validation using 10-fold cross-validation (N=6991) and external validation groups (N=1241)**

|                                                                                                   | Model Development Group | Internal Validation | External Validation |
|---------------------------------------------------------------------------------------------------|-------------------------|---------------------|---------------------|
| AUC (95% CI)                                                                                      | GA 24-30w               | GA 24-30w           | GA 24-30w           |
| At Birth                                                                                          | 0.91 (0.89 - 0.92)      | 0.91 (0.89 - 0.92)  | 0.88 (0.84 - 0.93)  |
| At PNA 6 weeks                                                                                    | 0.91 (0.89 - 0.92)      | 0.90 (0.89 - 0.92)  | 0.90 (0.86 - 0.94)  |
| At PNA 7 weeks                                                                                    | 0.91 (0.90 - 0.92)      | 0.91 (0.89 - 0.92)  | 0.90 (0.87 - 0.94)  |
| At PNA 8 weeks                                                                                    | 0.92 (0.91 - 0.93)      | 0.92 (0.91 - 0.93)  | 0.91 (0.89 - 0.94)  |
| At PNA 9 weeks                                                                                    | 0.92 (0.91 - 0.93)      | 0.92 (0.91 - 0.93)  | 0.92 (0.90 - 0.95)  |
| At PNA 10 weeks                                                                                   | 0.93 (0.92 - 0.94)      | 0.93 (0.92 - 0.94)  | 0.92 (0.90 - 0.94)  |
| At PNA 11 weeks                                                                                   | 0.94 (0.93 - 0.95)      | 0.94 (0.93 - 0.95)  | 0.92 (0.90 - 0.94)  |
| At PNA 12 weeks                                                                                   | 0.93 (0.92 - 0.94)      | 0.93 (0.92 - 0.94)  | 0.92 (0.89 - 0.95)  |
| At PNA 13 weeks                                                                                   | 0.93 (0.92 - 0.95)      | 0.93 (0.92 - 0.94)  | 0.90 (0.86 - 0.93)  |
| At PNA 14 weeks                                                                                   | 0.93 (0.92 - 0.94)      | 0.93 (0.91 - 0.94)  | 0.90 (0.85 - 0.95)  |
| AUC=Area under the receiver operating characteristic curve; PNA=postnatal age; GA=gestational age |                         |                     |                     |

**eTable 6. Specificity and cumulative specificity with 95% CI for 100% sensitivity over postnatal weeks for model development group (N=6991), internal validation using 10-fold cross-validation (N=6991) and external validation groups (N=1241) overall and by gestational age of <28 and ≥28 weeks, and for white and non-white population**

| Specificity<br>(95% CI)<br>min to max | Model development group * |                       |                       | Internal<br>validation*               | External validation*** |                       |                       |                             |                                |
|---------------------------------------|---------------------------|-----------------------|-----------------------|---------------------------------------|------------------------|-----------------------|-----------------------|-----------------------------|--------------------------------|
|                                       | GA 24-30w<br>N=6991       | GA 24-27w<br>N=2719   | GA 28-30w<br>N=4272   | GA 24-30w<br>N=6991                   | GA 24-30w<br>N=1241    | GA 24-27w<br>N=524    | GA 28-30w<br>N=717    | GA 24-30w<br>White<br>N=177 | GA 24-30w<br>Non-white<br>N=63 |
| <b>At Birth</b>                       | 53.1<br>(51.9 - 54.3)     | 11.9<br>(10.6 - 13.3) | 76.8<br>(75.5 - 78.0) | 48.0<br>(46.8 - 49.2)<br>47.5 to 55.5 | 46.3<br>(43.4 - 49.2)  | 11.3<br>(8.6 - 14.5)  | 69.7<br>(66.2 - 73.1) | 54.5<br>(46.9 - 62.1)       | 38.3<br>(26.1 - 51.8)          |
| <b>At PNA 6 weeks</b>                 | 52.4<br>(51.2 - 53.6)     | 11.5<br>(10.2 - 12.8) | 75.9<br>(74.6 - 77.2) | 51.4<br>(50.2 - 52.6)<br>49.3 to 52.4 | 44.8<br>(41.9 - 47.7)  | 10.3<br>(7.7 - 13.3)  | 67.9<br>(64.4 - 71.3) | 52.3<br>(44.6 - 59.8)       | 38.3<br>(26.1 - 51.8)          |
| <b>At PNA 7 weeks</b>                 | 51.2<br>(50.0 - 52.4)     | 12.7<br>(11.4 - 14.1) | 73.3<br>(72.0 - 74.7) | 50.4<br>(49.2 - 51.6)<br>48.4 to 51.5 | 41.7<br>(38.9 - 44.6)  | 10.9<br>(8.2 - 14.0)  | 62.3<br>(58.7 - 65.9) | 49.4<br>(41.8 - 57.1)       | 36.7<br>(24.6 - 50.1)          |
| <b>At PNA 8 weeks</b>                 | 58.4<br>(57.2 - 59.6)     | 14.7<br>(13.3 - 16.2) | 83.5<br>(82.4 - 84.6) | 57.5<br>(56.4 - 58.7)<br>56.8 to 58.9 | 49.0<br>(46.1 - 51.9)  | 13.2<br>(10.3 - 16.5) | 73.0<br>(69.6 - 76.2) | 56.3<br>(48.6 - 63.7)       | 45.0<br>(32.1 - 58.4)          |
| <b>At PNA 9 weeks</b>                 | 64.9<br>(63.7 - 66.0)     | 25.5<br>(23.8 - 27.3) | 87.4<br>(86.4 - 88.4) | 63.7<br>(62.6 - 64.9)<br>62.3 to 64.8 | 55.8<br>(52.9 - 58.6)  | 22.2<br>(18.5 - 26.2) | 78.3<br>(75.1 - 81.3) | 58.0<br>(50.3 - 65.3)       | 46.7<br>(33.7 - 60.0)          |
| <b>At PNA 10 weeks</b>                | 69.5<br>(68.3 - 70.6)     | 27.1<br>(25.4 - 28.9) | 93.7<br>(93.0 - 94.4) | 64.7<br>(63.6 - 65.9)<br>64.7 to 69.4 | 61.3<br>(58.5 - 64.1)  | 22.0<br>(18.3 - 26.0) | 87.7<br>(85.0 - 90.0) | 60.2<br>(52.6 - 67.5)       | 51.7<br>(38.4 - 64.8)          |
| <b>At PNA 11 weeks</b>                | 73.0<br>(72.0 - 74.1)     | 37.2<br>(35.2 - 39.1) | 93.6<br>(92.8 - 94.3) | 71.9<br>(70.8 - 73.0)<br>70.1 to 72.2 | 65.0<br>(62.2 - 67.7)  | 32.0<br>(27.8 - 36.4) | 87.1<br>(84.4 - 89.5) | 63.1<br>(55.5 - 70.2)       | 56.7<br>(43.2 - 69.4)          |
| <b>At PNA 12 weeks</b>                | 72.9<br>(71.8 - 73.9)     | 37.2<br>(35.2 - 39.1) | 93.3<br>(92.5 - 94.1) | 69.7<br>(68.6 - 70.8)<br>66.1 to 71.6 | 64.8<br>(62.0 - 67.5)  | 31.8<br>(27.6 - 36.2) | 86.8<br>(84.1 - 89.2) | 62.5<br>(54.9 - 69.7)       | 56.7<br>(43.2 - 69.4)          |
| <b>At PNA 13 weeks</b>                | 78.6<br>(77.5 - 79.5)     | 45.2<br>(43.2 - 47.2) | 97.7<br>(97.2 - 98.1) | 77.0<br>(76.0 - 78.0)<br>75.2 to 77.0 | 72.8<br>(70.2 - 75.3)  | 37.7<br>(33.3 - 42.2) | 96.4<br>(94.7 - 97.6) | 67.0<br>(59.6 - 73.9)       | 61.7<br>(48.2 - 73.9)          |
| <b>At PNA 14 weeks</b>                | 77.8<br>(76.8 - 78.8)     | 43.1<br>(41.2 - 45.1) | 97.7<br>(97.2 - 98.1) | 75.3<br>(74.2 - 76.3)<br>74.9 to 76.5 | 72.1<br>(69.5 - 74.7)  | 36.0<br>(31.7 - 40.5) | 96.4<br>(94.7 - 97.6) | 66.5<br>(59.0 - 73.4)       | 61.7<br>(48.2 - 73.9)          |
| <b>Cumulatively at PNA 6 weeks</b>    | 53.3<br>(52.0 - 54.5)     | 12.2<br>(10.9 - 13.6) | 76.8<br>(75.5 - 78.1) | 52.3<br>(51.1 - 53.5)<br>51.7 to 55.7 | 46.4<br>(43.5 - 49.3)  | 11.3<br>(8.6 - 14.5)  | 69.9<br>(66.4 - 73.2) | 54.5<br>(46.9 - 62.1)       | 38.3<br>(26.1 - 51.8)          |
| <b>Cumulatively at PNA 7 weeks</b>    | 54.2<br>(53.0 - 55.4)     | 14.8<br>(13.4 - 16.2) | 76.8<br>(75.5 - 78.1) | 53.4<br>(52.2 - 54.6)<br>51.8 to 56.1 | 47.2<br>(44.4 - 50.1)  | 13.4<br>(10.5 - 16.8) | 69.9<br>(66.4 - 73.2) | 55.1<br>(47.4 - 62.6)       | 38.3<br>(26.1 - 51.8)          |
| <b>Cumulatively at PNA 8 weeks</b>    | 60.5<br>(59.3 - 61.7)     | 17.1<br>(15.7 - 18.7) | 85.4<br>(84.3 - 86.4) | 60.0<br>(58.8 - 61.1)<br>59.6 to 61.6 | 53.5<br>(50.6 - 56.4)  | 15.9<br>(12.7 - 19.5) | 78.7<br>(75.5 - 81.7) | 60.2<br>(52.6 - 67.5)       | 45.0<br>(32.1 - 58.4)          |

| Specificity<br>(95% CI)<br>min to max   | Model development group * |                       |                       | Internal<br>validation*               | External validation*** |                       |                       |                             |                                |
|-----------------------------------------|---------------------------|-----------------------|-----------------------|---------------------------------------|------------------------|-----------------------|-----------------------|-----------------------------|--------------------------------|
|                                         | GA 24-30w<br>N=6991       | GA 24-27w<br>N=2719   | GA 28-30w<br>N=4272   | GA 24-30w<br>N=6991                   | GA 24-30w<br>N=1241    | GA 24-27w<br>N=524    | GA 28-30w<br>N=717    | GA 24-30w<br>White<br>N=177 | GA 24-30w<br>Non-white<br>N=63 |
| <b>Cumulatively at<br/>PNA 9 weeks</b>  | 67.6<br>(66.5 - 68.7)     | 28.6<br>(26.8 - 30.4) | 90.0<br>(89.1 - 90.9) | 66.5<br>(65.3 - 67.6)<br>65.5 to 68.0 | 61.2<br>(58.3 - 63.9)  | 25.1<br>(21.3 - 29.2) | 85.3<br>(82.5 - 87.8) | 63.6<br>(56.1 - 70.7)       | 48.3<br>(35.2 - 61.6)          |
| <b>Cumulatively at<br/>PNA 10 weeks</b> | 72.1<br>(71.0 - 73.2)     | 31.3<br>(29.5 - 33.2) | 95.5<br>(94.8 - 96.1) | 68.6<br>(67.5 - 69.7)<br>68.6 to 72.2 | 65.9<br>(63.1 - 68.5)  | 26.2<br>(22.3 - 30.3) | 92.4<br>(90.2 - 94.3) | 65.3<br>(57.8 - 72.3)       | 51.7<br>(38.4 - 64.8)          |
| <b>Cumulatively at<br/>PNA 11 weeks</b> | 75.3<br>(74.3 - 76.4)     | 40.1<br>(38.1 - 42.1) | 95.5<br>(94.9 - 96.1) | 74.3<br>(73.2 - 75.3)<br>73.8 to 75.2 | 69.3<br>(66.6 - 71.9)  | 34.7<br>(30.5 - 39.2) | 92.4<br>(90.2 - 94.3) | 65.9<br>(58.4 - 72.9)       | 56.7<br>(43.2 - 69.4)          |
| <b>Cumulatively at<br/>PNA 12 weeks</b> | 75.5<br>(74.5 - 76.5)     | 40.6<br>(38.6 - 42.6) | 95.5<br>(94.9 - 96.1) | 74.9<br>(73.9 - 75.9)<br>74.4 to 75.6 | 69.6<br>(66.9 - 72.2)  | 35.4<br>(31.1 - 39.8) | 92.6<br>(90.4 - 94.4) | 65.9<br>(58.4 - 72.9)       | 56.7<br>(43.2 - 69.4)          |
| <b>Cumulatively at<br/>PNA 13 weeks</b> | 80.6<br>(79.6 - 81.5)     | 49.3<br>(47.3 - 51.3) | 98.6<br>(98.2 - 98.9) | 80.0<br>(79.0 - 80.9)<br>79.3 to 80.0 | 75.2<br>(72.6 - 77.6)  | 41.8<br>(37.4 - 46.4) | 97.5<br>(96.0 - 98.5) | 68.8<br>(61.3 - 75.5)       | 63.3<br>(49.9 - 75.4)          |
| <b>Cumulatively at<br/>PNA 14 weeks</b> | 80.6<br>(79.7 - 81.6)     | 49.3<br>(47.3 - 51.3) | 98.6<br>(98.2 - 98.9) | 80.1<br>(79.2 - 81.1)<br>79.8 to 80.3 | 75.2<br>(72.6 - 77.6)  | 41.8<br>(37.4 - 46.4) | 97.5<br>(96.0 - 98.5) | 68.8<br>(61.3 - 75.5)       | 63.3<br>(49.9 - 75.4)          |

CI=confidence interval; PNA=postnatal age; GA=gestational age; w=weeks  
Model development group includes data from Swedish national registry for retinopathy of prematurity, born at gestational age of 24-30 weeks (2007-2017).  
Validation groups consist of four external validation cohorts, one from Sweden (later time period than in model development group), one from Germany and two from the United States.  
Specificity is obtained from each PNA-model applying cut-offs based on estimated probabilities for 100% sensitivity in model development group.  
Cumulative specificity at a certain PNA is calculated as a union of specificities up to and including that certain PNA.  
\*Cut-offs selected in model development group for sensitivity 100%.  
\*\*For internal validation same models were run applying 10-fold cross-validation and cut-offs based on those estimates retrieved. The range (min to max) obtained using 10 randomly selected seeds expresses the uncertainty of the internal validation.  
\*\*\*For validation groups, cut-offs obtained from model development group are applied. Sensitivity 100% for all postnatal weeks except for 1 infant at birth, and PNA 6 and 7 weeks (sensitivity 48/49 at those time points), with severe comorbidity profile.



**eTable 7. Distribution of maximum retinopathy of prematurity stage for infants not needing and needing retinopathy of prematurity screening according to DIGIROP-Screen (N=6991)**

| Need for ROP Screening acc. to DIGIROP-Screen                                                      | No ROP (n=4965) | Max stage 1 (n=661) | Max stage 2 not treated (n=771) | Max stage 3 not treated (n=307) | Treated ROP (n=287) |
|----------------------------------------------------------------------------------------------------|-----------------|---------------------|---------------------------------|---------------------------------|---------------------|
| <b>Risk flag at Birth</b>                                                                          |                 |                     |                                 |                                 |                     |
| No                                                                                                 | 3179 (64.0%)    | 202 (30.6%)         | 137 (17.8%)                     | 44 (14.3%)                      | 0 (0.0%)            |
| Yes                                                                                                | 1786 (36.0%)    | 459 (69.4%)         | 634 (82.2%)                     | 263 (85.7%)                     | 287 (100.0%)        |
| <b>Risk flag cumulatively up to PNA 8 weeks</b>                                                    |                 |                     |                                 |                                 |                     |
| No                                                                                                 | 3630 (73.1%)    | 227 (34.3%)         | 152 (19.7%)                     | 47 (15.3%)                      | 0 (0.0%)            |
| Yes                                                                                                | 1335 (26.9%)    | 434 (65.7%)         | 619 (80.3%)                     | 260 (84.7%)                     | 287 (100.0%)        |
| <b>Risk flag cumulatively up to PNA 12 weeks</b>                                                   |                 |                     |                                 |                                 |                     |
| No                                                                                                 | 4503 (90.7%)    | 287 (43.4%)         | 215 (27.9%)                     | 57 (18.6%)                      | 0 (0.0%)            |
| Yes                                                                                                | 462 (9.3%)      | 374 (56.6%)         | 556 (72.1%)                     | 250 (81.4%)                     | 287 (100.0%)        |
| ROP=retinopathy of prematurity; PNA=postnatal age<br>For categorical variables n (%) is presented. |                 |                     |                                 |                                 |                     |
